# Supplementary material
Source: ML conference proceedings conference paper supplement (https://openreview.net/forum?id=fru52tkjHf)
Supplement: supplementary_material [file _NeurIPS_2025__ASGO__Adaptive_Structured_Gradient_Optimization.pdf › _NeurIPS_2025__ASGO__Adaptive_Structured_Gradient_Optimization_Supplementary Material/_NeurIPS_2025__ASGO__Adaptive_Structured_Gradient_Optimization.pdf]

---

# ASGO: Adaptive Structured Gradient Optimization

---

Anonymous Author(s)

Affiliation

Address

email

## Abstract

1 Training deep neural networks is a structured optimization problem, because the  
2 parameters are naturally represented by matrices and tensors rather than by vectors.  
3 Under this structural representation, it has been widely observed that gradients are  
4 low-rank and Hessians are approximately block-wise diagonal. These structured  
5 properties are crucial for designing efficient optimization algorithms, but are not  
6 utilized by many current popular optimizers like Adam. In this paper, we present  
7 a novel optimization algorithm ASGO that capitalizes on these properties by em-  
8 ploying a preconditioner that is adaptively updated using structured gradients. By  
9 fine-grained theoretical analysis, ASGO is proven to achieve superior convergence  
10 rates compared to existing structured gradient methods. Based on the convergence  
11 theory, we further demonstrate that ASGO can benefit from the low-rank and  
12 block-wise diagonal properties. We also discuss practical modifications of ASGO  
13 and empirically verify ASGO’s effectiveness on language model tasks.

## 14 1 Introduction

15 Numerical optimization algorithms, especially those can efficiently train large foundation models [De-  
16 vlin et al., 2018, Brown et al., 2020, Touvron et al., 2023, Touvron et al., Ouyang et al., 2022], play  
17 an important role in the modern machine learning field. Among them, adaptive gradient methods like  
18 AdaGrad [Duchi et al., 2011] and Adam [Kingma and Ba, 2014] are popular choices, gaining huge  
19 success in training state-of-the-art models in many tasks. These algorithms typically apply a diagonal  
20 matrix preconditioner to the gradient  $g_t$  to update the deep neural network (DNN) parameters  $w_t$ ;

$$w_{t+1} = w_t - \eta_t \Lambda_t^{-1} g_t, \text{ where } w_t \in \mathbb{R}^d, g_t \in \mathbb{R}^d, \text{ and } \Lambda_t \in \mathbb{R}^{d \times d} \text{ is a diagonal matrix.}$$

21 This coordinate-wise step size design has been theoretically verified to be effective as it can exploit the  
22 sparsity of the gradient vectors  $g_t$  [Duchi et al., 2011]. Also, when the Hessian is well-approximated  
23 by a diagonal matrix whose diagonal entries have very different scales, adaptive gradient methods  
24 have been proven to be beneficial [Liu et al., 2024, Jiang et al., 2024a, Xie et al., 2024]. While  
25 these results seem to be convincing, common DNNs do not necessarily have sparse gradients or  
26 Hessians that are well-approximated by ill-conditioned diagonal matrices. Instead, if we take the  
27 matrix structure of gradients in neural networks into account, it has been widely observed that these  
28 structured gradients are usually low-rank [Zhao et al., 2021, Yang et al., 2023, Cosson et al., 2023],  
29 and the Hessians are well-approximated by block-wise diagonal matrices [Collobert, 2004, Zhang  
30 et al., 2024a,b]. Since adaptive gradient methods like Adam, treat the parameters as vectors and ignore  
31 the matrix structure of gradients, they are generally unable to exploit these structured properties. This  
32 gap makes us ask the following question: *How can we properly consider the matrix structures of*  
33 *gradients and exploit their low-rank and block-wise diagonal properties?*

34 One possible answer is provided by Shampoo [Gupta et al., 2018]:

$$W_{t+1} = W_t - \eta_t L_t^{-\frac{1}{4}} G_t R_t^{-\frac{1}{4}}, \text{ where } W_t, G_t \in \mathbb{R}^{m \times n} \text{ and } L_t \in \mathbb{R}^{m \times m}, R_t \in \mathbb{R}^{n \times n} \text{ are full matrices.}$$

The main motivation for such a design is that if we apply vectorization to the update, the Shampoo preconditioner is a single matrix that is the Kronecker product of  $L_t^{-\frac{1}{4}}$  and  $R_t^{-\frac{1}{4}}$ , which approximates the full-matrix preconditioner for AdaGrad [Duchi et al., 2011]. However, the theoretical convergence of Shampoo is worse than that for AdaGrad or even SGD when the dimension is large. Also, Shampoo needs more memory and much heavier computation than adaptive gradient methods because it requires two preconditioners, making it less suitable for training large-scale DNNs.

In this paper, we provide an answer to the aforementioned question by proposing ASGO (Adaptive Structured Gradient Optimization), which significantly improves the convergence guarantees of Shampoo while requiring less memory and computation. In light of the analysis that demonstrates the benefits of adaptive gradient methods [Duchi et al., 2011, Liu et al., 2024, Jiang et al., 2024a, Xie et al., 2020], we use appropriate assumptions to enable a more fine-grained convergence analysis, showing superior convergence results and how ASGO can benefit from the low-rank and block-wise diagonal properties of the problem. We also discuss the connection between ASGO and Muon [Jordan et al., 2024], a structured gradient method based upon the steepest descent algorithm with spectral norm, to conjecture a relation between ASGO and Muon analogous to the relation between AdaGrad and SignSGD [Bernstein et al., 2018, Kunstner et al., 2023]. Furthermore, we develop an efficient design for query-key attention parameters in transformer models and examine the empirical performance on pretraining transformer model tasks.

Our main contributions are summarized as follows.

- We propose the structured gradient based algorithm ASGO, theoretically analyze its convergence, and show that it converges faster than full-matrix AdaGrad and Shampoo.
- We further demonstrate that ASGO can effectively exploit the low-rankness of gradients as well as the approximate block-wise diagonal property of Hessians that is typically observed in training DNNs, hence indicating great potential of ASGO for real-world applications.
- We develop a practical implementation of ASGO with targeted modifications for transformer architectures that offers significant advantages: it eliminates the need for a separate optimizer for 1D parameters in contrast to Muon, while requiring less memory and computational complexity than Shampoo.
- We empirically validate the effectiveness of ASGO with modifications on language model tasks, demonstrating the algorithm’s great potential in real applications.

## 2 Related Work

**Adaptive Gradient Methods.** Adaptive gradient methods that use diagonal preconditioners to speedup the convergence are extremely popular for solving many real-world optimization problems. To the best of our knowledge, the first method of this kind for machine learning, AdaGrad [Duchi et al., 2011, Streeter and McMahan, 2010], was developed based on rigorous theory that showed the benefits of using this kind of preconditioner. Adam [Kingma and Ba, 2014, Loshchilov and Hutter, 2017] modified AdaGrad and has become the default choice for training large foundation models. In theory, it has been proven that adaptive gradient methods can benefit from sparse gradients and approximately ill-conditioned Hessians [Duchi et al., 2011, Liu et al., 2024, Jiang et al., 2024a, Xie et al., 2024]. It is worth noting that the original AdaGrad paper [Duchi et al., 2011] also proposed a version of AdaGrad that uses a full-matrix preconditioner instead of the diagonal one, which is believed to perform even better. However, this full-matrix AdaGrad method suffers from large memory costs for storing the preconditioner, and there is no better convergence guarantee compared to diagonal AdaGrad and SGD under the same settings as listed in Section 4.

**Optimization with Matrix Structure.** In the standard optimization literature (i.e., excluding areas such as conic optimization), it is common to consider variables as vectors. However, recently, optimization methods for machine learning that consider variables as matrices have been rapidly gaining attention. Adafactor [Shazeer and Stern, 2018], LAMB [You et al., 2019], and Adam-mini [Zhang et al., 2024b] consider the matrix or layer structure to help reduce the memory cost of Adam and enable more efficient training. Shampoo [Gupta et al., 2018] and KFAC [Martens and Grosse, 2015] are two pioneering works that approximate, respectively, the full-matrix preconditioner of AdaGrad and the **true** Fisher matrix (FM), using Kronecker products of smaller matrices, making

the memory cost more affordable. Unfortunately, the analysis in [Gupta et al., 2018] shows that the rate of convergence for Shampoo is no better than that for the full-matrix AdaGrad. We note that there is another method, TNT [Ren and Goldfarb, 2021] that is very closely related to Shampoo. TNT was developed as a natural gradient method, approximating the **true** FM by the covariance of block-wise sampling-based gradients assuming that they are Tensor-Normally distributed. The main difference between TNT and Shampoo, is that TNT uses true FMs and inverses of their Kronecker factors, whereas Shampoo uses empirical FMs and the  $-1/4$  power of their factors. More discussion on recent and concurrent work is presented in Appendix A.

### 3 Our ASGO Algorithm

#### 3.1 Notation and problem setting

Throughout this paper, we use capital letters such as  $W$  to represent matrices and  $[W]_{i,j}$  to denote the  $(i, j)$ -th entry of  $W$ . For an arbitrary matrix  $W \in \mathbb{R}^{m \times n}$ , we denote

- $\|W\|_{\text{op}}$  as the spectral norm of a matrix  $W$ , i.e., the largest singular value of it;
- $\|W\|_*$  as the trace norm of a matrix  $W$ , i.e., the summation of its singular values, which is well-known as the dual norm of the spectral norm;
- $\|W\|_F$  as the Frobenius norm of  $W$ , which also equals  $\text{tr}(W^\top W)$ , where  $\text{tr}(\cdot)$  is the trace;
- $\|W\|_L \triangleq \text{tr}(W^\top L W)$ , where  $L \in \mathbb{R}^{m \times m}$  is a real symmetric positive definite matrix.

For symmetric square matrices,  $A, B \in \mathbb{R}^{m \times m}$ ,  $A \preceq B$  denotes that  $B - A$  is positive semidefinite and  $A \prec B$  denotes that  $B - A$  is positive definite.  $\succ$  and  $\succeq$  are defined accordingly.

We study the following stochastic optimization problem:

$$\min_{W \in \mathbb{R}^{m \times n}} f(W) \triangleq \mathbb{E}_\xi [f(W, \xi)], \quad (1)$$

where we only have access to a stochastic gradient oracle  $\nabla f(W; \xi)$  at  $W$ .

#### 3.2 ASGO (Algorithm 1)

We propose ASGO (Adaptive Structured Gradient Optimization) in Algorithm 1, which is an algorithm with a single-side preconditioner. Compared to full-matrix AdaGrad, ASGO preserves and utilizes the matrix structure of  $W_t$  and  $G_t$ , avoiding the huge memory cost for storing its preconditioner. ASGO's preconditioner consists of a single matrix compared to the two matrices used by Shampoo, leading to the following main update rule:

$$W_{t+1} = W_t - \eta_t V_t^{-\frac{1}{2}} G_t, \text{ where } W_t \in \mathbb{R}^{m \times n} \text{ and } V_t \in \mathbb{R}^{m \times m} \text{ is a full matrix.}$$

ASGO only needs to store one preconditioner matrix and compute its matrix square root and inverse on each iteration, versus two matrices for Shampoo. On the other hand, ASGO's preconditioner may not be as good an approximation to the full-matrix AdaGrad preconditioner or the empirical Fisher matrix [Gupta et al., 2018, Morwani et al., 2024] as Shampoo's. However, as we shall see in the following sections, this design can actually better exploit the low-rankness of gradients and the block-wise diagonal nature of Hessians, in terms of achieving better convergence rates.

### 4 Nonsmooth Theory

Although DNNs are generally nonconvex globally, convexity may apply locally in some regions. Thus, convex analysis can be helpful for understanding the behavior of DNN training algorithms.

**Assumption 1** (Convexity).  $f(\cdot)$  is convex and  $W_*$  is one of its minimizers.

**Theorem 1** (Nonsmooth convergence). Under Assumption 1, for Algorithm 1 with  $\eta_t \equiv \eta = D_{\text{op}}$ , it holds that

$$\frac{1}{T} \sum_{t=0}^{T-1} \mathbb{E}[f(W_t)] - f(W_*) \leq \frac{1}{T} \mathbb{E} \left[ \left\| \left( \sum_{t=0}^{T-1} G_t G_t^\top \right)^{\frac{1}{2}} \right\|_* \right] \cdot D_{\text{op}} + \frac{\epsilon D_F^2}{D_{\text{op}} T},$$

---

**Algorithm 1** ASGO (Adaptive Structured Gradient Optimization)

---

1: **Input:**  $W_0 \in \mathbb{R}^{m \times n}$ , schedule  $\{\eta_t\}$  batch size  $M \in \mathbb{N}$ , and the number of iterations  $T$ ,  
     $\epsilon > 0$ , ( $\epsilon$  should be small, similar to the  $\epsilon$  for Adam or AdaGrad.)  
2: Initialize  $V_{-1} = 0 \in \mathbb{R}^{m \times m}$   
3: **for**  $t = 0$  **to**  $T - 1$  **do**  
4:   Sample mini-batch  $\mathcal{B}_t$  with  $|\mathcal{B}_t| \equiv M$  uniformly  
5:    $G_t = \frac{1}{M} \sum_{\xi \in \mathcal{B}_t} \nabla_W f(W_t; \xi)$  ▷ Compute stochastic sub-gradient  
6:    $V_t = V_{t-1} + G_t G_t^\top$   
7:    $\Lambda_t = V_t^{\frac{1}{2}} + \epsilon I_m$  ▷ Use the square root of the summation to update  
8:    $W_{t+1} = W_t - \eta_t \Lambda_t^{-1} G_t$   
9: **end for**

---

126 where  $D_{\text{op}} \triangleq \max_{0 \leq t \leq T-1} \|W_t - W_*\|_{\text{op}}$  and  $D_{\text{F}} \triangleq \max_{0 \leq t \leq T-1} \|W_t - W_*\|_{\text{F}}$ .

127 **Corollary 2.** *If we also assume an upper bound for each stochastic sub-gradient such that*  
128  $\mathbb{E}[G_t G_t^\top] \preceq Q^2$ , *where  $Q \in \mathbb{R}^{m \times m}$  is a positive definite matrix, Theorem 1 also implies*

$$\frac{1}{T} \sum_{t=0}^{T-1} \mathbb{E}[f(W_t)] - f(W_*) \leq \mathcal{O}\left(\frac{\|Q\|_* D_{\text{op}}}{\sqrt{T}} + \frac{\epsilon D_{\text{F}}^2}{D_{\text{op}} T}\right).$$

129 **Remark 1.** *Note that we treat  $D_{\text{op}}$  as a constant here, but it may increase as the iteration number  $T$*   
130 *increases. This can be addressed, for example, by invoking a projection onto a bounded convex set*  
131  *$\mathcal{W}$  with respect to the norm  $\|\cdot\|_{\Lambda_t}$  in each iteration, as in AdaGrad [Duchi et al., 2011].  $D_{\text{op}}$  would*  
132 *then be bounded by the spectral norm of  $\mathcal{W}$ . However, since this projection is rarely used in training*  
133 *DNNs, we follow Gupta et al. [2018] and omit it in Algorithm 1. More importantly, this theoretical*  
134 *bound depends on the trace norm of gradients and the spectral norm of weights, showing that the*  
135 *algorithm can make use of the low-rank property of gradients.*

136 One can easily check that this convergence rate for convex nonsmooth problems is  $\mathcal{O}(1/\sqrt{T})$ , the  
137 same as SGD [Zinkevich, 2003] (see below) and AdaGrad [Duchi et al., 2011].

138 **Comparison with SGD.** The convergence rate for SGD under the assumptions of Corollary 2 is:

$$\text{SGD: } \frac{1}{T} \sum_{t=0}^{T-1} \mathbb{E}[f(W_t)] - f(W_*) \leq \mathcal{O}\left(\frac{D_{\text{F}} \|Q\|_{\text{F}}}{\sqrt{T}}\right),$$

139 where  $D_{\text{F}}$  and  $\|Q\|_{\text{F}}$  are the Frobenius norm upper bounds for the weights and gradients, respectively.  
140 By comparing this bound with Corollary 2, we have

- 141 •  $\|Q\|_{\text{F}} \leq \|Q\|_* \leq \sqrt{r_G} \|Q\|_{\text{F}}$ , where  $r_G$  is the rank of  $Q$ . Thus when  $G_t$  are low-rank, or have  
142 very imbalanced singular values,  $\|Q\|_*$  can be close to  $\|Q\|_{\text{F}}$ ;
- 143 •  $D_{\text{F}}/\sqrt{r_D} \leq D_{\text{op}} \leq D_{\text{F}}$ , where  $r_D = \max \text{rank of}(W_t - W_*)$ . Thus, when  $W_t - W_*$  are relatively  
144 high-rank or have lots of singular values of a similar scale,  $D_{\text{op}}$  can be much smaller than  $D_{\text{F}}$ .

145 Therefore, ASGO should work well when  $G_t$  are low-rank and  $W_t - W_*$  are relatively high-rank.

146 **Intuitions on ASGO in practical tasks.** We argue that low-rank  $G_t$  and relatively high-rank  $W_t - W_*$   
147 should be common in many practical tasks, revealing the potential of ASGO in applications. As we  
148 have discussed in Section 2, gradients are commonly low-rank in DNNs, as verified by Zhao et al.  
149 [2021], Yang et al. [2023], Cosson et al. [2023]. Meanwhile, given the huge success of LoRA [Hu  
150 et al., 2022] in fine-tuning foundation models, which naturally asserts a low-rank total update in  
151  $W$ , there may seem to be a conflict to assume that  $W_t - W_*$  has a high rank. However, it has been  
152 observed that  $W_0 - W_*$  should be relatively high-rank to obtain a better result, at least in pretraining  
153 and some complex fine-tuning tasks for large foundation models [Lialin et al., 2023, Jiang et al.,  
154 2024b, Huang et al., 2025]. Further exploration of the connection between the rank of weight updates  
155 and the performance of algorithms is an interesting topic for future research.

156 **Comparison with Full-Matrix AdaGrad and Shampoo.** Shampoo [Gupta et al., 2018] and the  
157 full-matrix AdaGrad [Duchi et al., 2011] achieve the following convergence rates under the same

158 settings as Theorem 1.

$$\begin{aligned} \text{Full-Matrix AdaGrad: } & \mathcal{O} \left( D_F \sum_{j=1}^m \sum_{i=1}^n \sqrt{\sum_{t=0}^{T-1} [G_t]_{i,j}^2} \right) \\ \text{Shampoo: } & \mathcal{O} \left( \sqrt{r} D_F \cdot \text{tr} \left( \left( \sum_{t=0}^{T-1} G_t G_t^\top \right)^{\frac{1}{4}} \right) \cdot \text{tr} \left( \left( \sum_{t=0}^{T-1} G_t^\top G_t \right)^{\frac{1}{4}} \right) \right). \end{aligned}$$

159 We can check that Theorem 1 indicates a convergence speed that is at least  $D_F/D_{\text{op}}$  times faster than  
160 full-matrix AdaGrad and  $\sqrt{r_G} D_F/D_{\text{op}}$  times faster than Shampoo; (see Appendix E for proofs). This  
161 also provides theoretical evidence that single-side preconditioning may be better at exploiting low-  
162 rankness of gradients, yielding a faster convergence speed compared to Shampoo-like preconditioning.

163 **Remark 2.** *Proofs of all of the results in this section are given in Appendix E. We keep the matrix*  
164 *structure of  $W_t$  and  $G_t$  throughout our analysis, in contrast to standard analyses of the convergence*  
165 *of AdaGrad and Shampoo, which are based on vectorizations of  $W_t$  and  $G_t$ . This is important for*  
166 *proving that ASGO can exploit the structured properties.*

## 167 5 Smooth Theory

168 It is also important to study the performance of Algorithm 1 in smooth settings, as many real training  
169 tasks have been widely observed to be smooth, at least locally. Also, only in smooth settings can we  
170 properly describe the importance of batch size.

171 **Assumption 2** (Smoothness).  *$f$  is 1-smooth with respect to  $\|\cdot\|_L$ , where  $L \in \mathbb{R}^{m \times m}$  is a symmetric*  
172 *positive definite matrix and for any  $X \in \mathbb{R}^{m \times n}$ ,*

$$\|X\|_L^2 \triangleq \text{tr}(X^\top L X).$$

173 If  $X = [x_1, \dots, x_n]$ , where each  $x_i \in \mathbb{R}^m$ , and we vectorize  $X$ , i.e.,  $\mathbf{x} \equiv \text{vec}(X) = (x_1^\top, \dots, x_n^\top)^\top$ ,  
174 and form the block diagonal matrix  $\mathbf{L} \triangleq \text{diag}[L, \dots, L]$ , we obtain that  $\text{tr}(X^\top L X) =$   
175  $\sum_{i=1}^n x_i^\top L x_i = \mathbf{x}^\top \mathbf{L} \mathbf{x}$ . This means that Assumption 2 is equivalent to the existence of a sym-  
176 metric matrix  $L \in \mathbb{R}^{m \times m}$ ,  $L \succ 0$  such that for any  $w \in \mathbb{R}^{mn}$ ,  $-\mathbf{L} \preceq \nabla^2 f_v(\mathbf{w}) \preceq \mathbf{L}$ , where  
177  $f_v(\mathbf{w}) = f(W)$ ,  $W = [w_1, \dots, w_n] \in \mathbb{R}^{m \times n}$  and  $\mathbf{w} \equiv \text{vec}(W) = [w_1^\top, \dots, w_n^\top]^\top \in \mathbb{R}^{mn}$ .  
178 Hence, it is closely related to the block-wise diagonal structure of the Hessian as observed by many  
179 researchers; (see Figure 3 in Appendix A). Also note that Assumption 2 implies the standard smooth-  
180 ness assumption with respect to the Frobenius norm by  $\|\nabla f_v(\mathbf{w})\|_{\text{op}} \leq \|L\|_{\text{op}}$ . This block-wise  
181 diagonal smoothness is an extension of the standard smoothness, which is related to but different  
182 from the diagonal anisotropic smoothness employed for analyzing sign-based and adaptive gradient  
183 methods [Bernstein et al., 2018, Liu et al., 2024].

184 **Assumption 3** (Variance). *Let  $N_t \triangleq \nabla f(W_t; \xi) - \nabla f(W_t) \in \mathbb{R}^{m \times n}$  be the stochastic gradient*  
185 *noise. We assume that  $\mathbb{E}[N_t] = 0$  and there exists a symmetric positive definite matrix  $V$  such that*

$$\mathbb{E}[N_t N_t^\top] \preceq V^2.$$

186 One can check that Assumption 3 implies the standard variance bound  $\mathbb{E}[\|N_t\|_F^2] \leq \|V\|_F^2$ . The  
187 assumption shares some similarity with the coordinate-wise variance bounds in Bernstein et al. [2018],  
188 Crawshaw et al. [2022], Liu et al. [2024], in the sense that it allows a more fine-grained analysis.  
189 This matrix-form variance upper bound may better describe the real case since it takes the structure  
190 of the noise into account, which is relevant to matrix rank and other structured properties.

191 **Theorem 3** (Smooth Convergence). *Under Assumptions 1, 2 and 3, for Algorithm 1 with  $\eta_t \equiv \eta =$*   
192  *$D_{\text{op}}$  and a batch size of  $M$ , it holds that*

$$\frac{1}{T} \sum_{t=0}^{T-1} \mathbb{E}[f(W_t)] - f(W_*) \leq \frac{4D_{\text{op}}^2 \|L\|_*}{T} + \frac{2\sqrt{2}D_{\text{op}} \|V\|_*}{\sqrt{MT}} + \frac{2\epsilon D_F^2}{D_{\text{op}} T},$$

193 where  $D_{\text{op}} \triangleq \max_{0 \leq t \leq T-1} \|W_t - W_*\|_{\text{op}}$ , and  $D_F \triangleq \max_{0 \leq t \leq T-1} \|W_t - W_*\|_F$ .

As discussed in Section 4,  $D_{\text{op}}$  and  $D_F$  can be bounded if we add a projection step in the update. The convergence rate specified in Theorem 3 is similar to the rate in Corollary 2 if the batch size  $M$  is small, when the  $\mathcal{O}(1/\sqrt{MT})$  term dominates the rate, and thus shares the same properties as we discussed in Section 4. This means that ASGO can benefit if the stochastic gradient noise  $V$  is generally low-rank. Furthermore, when the batch size  $M$  is large so that the  $\mathcal{O}(\|L\|_*/T)$  term contributes significantly to the bound, Theorem 3 implies more, which we now discuss.

**Comparison with SGD.** The convergence rate of SGD [Garrigos and Gower, 2023] is:

$$\text{SGD: } \frac{1}{T} \sum_{t=0}^{T-1} \mathbb{E}[f(W_t)] - f(W_*) \leq \mathcal{O} \left( \frac{D_F^2 \|L\|_{\text{op}}}{T} + \frac{D_F \|V\|_F}{\sqrt{MT}} \right),$$

where  $D_F$  is defined in Theorem 3. Since the comparison between the  $\mathcal{O}(1/\sqrt{MT})$  term is generally consistent with the discussion in Section 4, we further compare the  $\mathcal{O}(1/T)$  term here to provide some more intuition: we have

- $\|L\|_{\text{op}} \leq \|L\|_* \leq r_L \|L\|_{\text{op}}$ , where  $r_L$  is the rank of  $L$ . Thus when  $L$  is low-rank, or has very imbalanced singular values,  $\|L\|_*$  can be close to  $\|L\|_{\text{op}}$ ;
- $D_F/\sqrt{r_D} \leq D_{\text{op}} \leq D_F$ , where  $r_D = \max \text{rank of } (W_t - W_*)$ . Thus when  $W_t - W_*$  are of relatively high-rank or have lots of singular values of a similar scale,  $D_{\text{op}}$  can be much smaller than  $D_F$ .

Therefore, we can see that in general, ASGO should work well when the Hessian can be well approximated by a block-wise diagonal matrix with a low-rank  $L$  for each block and  $W_t - W_*$  are of relatively high-rank. Note that Hessians have been found to be low-rank in DNNs, especially after some steps of training [Sagun et al., 2016, 2017, Wu et al., 2020].

**Block-wise diagonal structure of DNNs.** It has been widely observed that the Hessian of MLPs and other DNNs, are approximately block-wise diagonal [Collobert, 2004, Zhang et al., 2024a,b, Bahamou et al., 2022], as shown in Figure 3 in Appendix A. This block-wise diagonal structure naturally arises from the structure of MLPs, where all the parameters associated with a particular neuron (i.e., all elements of either a row or column of  $W$ ) are more closely related and have a denser block Hessian matrix, than a set of parameters that do not share such an association. Intuitively, the elements of the rows of  $W$  seem to be more likely to be closely related to the columns of  $W$ . Based on Theorem 3, our algorithm should perform well in this block Hessian setting, showing great potential in real applications.

**Intuition on single-side preconditioners.** Since ASGO only uses single-side preconditioners, it is important to determine on which side they should be applied. As demonstrated in Figure 3, a block in the Hessian commonly corresponds to all input weights into a neuron in the next layer, i.e., as a row of  $W$ . Therefore, we may want the single-side preconditioner to be on the right side of  $G_t$ . Based on this block-wise diagonal structure, Shampoo-like double-sided preconditioners may not only suffer from higher memory and computation costs, but also may precondition less effectively, since they are trying to approximate the structured curvature information matrix using a dense matrix produced by a Kronecker product [Gupta et al., 2018, Morwani et al., 2024].

**Remark 3.** *The proof of Theorem 3 is given in Appendix F. The analysis is similar in its general outline to the smooth analysis for AdaGrad [Levy et al., 2018, Liu et al., 2024], but it is more complex because of the involvement of matrix operations in ASGO.*

## 6 Further Discussions on ASGO

**Connection with Muon.** Muon [Jordan et al., 2024] can be interpreted as a standard steepest descent algorithm utilizing the spectral norm [Bernstein and Newhouse, 2024b] with momentum. If we ignore the incorporated momentum, Muon computes

$$W_{t+1} = \underset{W \in \mathbb{R}^{m \times n}}{\text{argmin}} \left\{ \langle G_t, W - W_t \rangle + \frac{1}{2\eta_t} \|W - W_t\|_{\text{op}}^2 \right\}, \quad (2)$$

preserving the matrix structure of the problem and naturally exploiting the structured properties because of the involvement of spectral norm in the steepest descent framework. This aligns with

ASGO’s exploitation of structured properties. Moreover, if we ignore the momentum in both the gradient and the preconditioner, we can see that ASGO is equivalent to Muon.<sup>1</sup> Interestingly, this equivalence between ASGO and Muon in both theoretical basis and algorithm design is analogous to that between diagonal AdaGrad and SignSGD [Bernstein et al., 2018, Kunstner et al., 2023]. In this sense, we may interpret ASGO and Muon as AdaGrad and SignSGD for structured gradients, respectively. Note that Shampoo also admits such a relation with Muon in algorithmic design. However, as discussed in Section 4, Shampoo has a worse convergence rate and thus fails to benefit from the structured properties as does ASGO. To some extent, this means that ASGO may be a more appropriate approach than Shampoo as such an analog to diagonal AdaGrad.

From this intuition, we may also conjecture what the nonconvex convergence rate of ASGO is based on what it is for Muon. Hence, we prove in Appendix G that this rate for Muon is:

$$\min_{0 \leq t \leq T-1} \|\nabla f(W_t)\|_*^2 \leq \mathcal{O}\left(\frac{\|L\|_*(f(W_0) - f^*)}{T}\right), \quad (3)$$

where we assume that  $f^* \triangleq \inf f(W) > -\infty$ . Since diagonal AdaGrad and SignSGD have the same convergence rate in nonconvex settings up to logarithmic factors [Bernstein et al., 2018, Sun et al., 2023, Liu et al., 2024], we expect that ASGO has a nonconvex convergence rate comparable to (3) obtained by Muon up to logarithmic factors. It is an interesting future topic to prove this conjecture and further explore the nonconvex behavior of ASGO theoretically. Also, we note that as an intuitively smoother version of Muon, ASGO has good convergence properties in nonsmooth settings as shown in Section 4, where Muon, like SignSGD [Bernstein et al., 2018], may fail to converge [Karimireddy et al., 2019].

**Remark 4.** *However, in smooth settings, nonconvex convergence analysis of Muon has been presented in Li and Hong [2025]. They establish the convergence results under a more general setting, involving gradient noise and momentum following the analysis in Cutkosky and Mehta [2020]. However, if we only look at the deterministic case, their result is worse than (3) because of the explicit dependence on the dimension  $n$ . The key here is that the standard smoothness condition with respect to the Frobenius norm is not a good fit for analyzing structured gradient algorithms like Muon or ASGO. Using Assumption 2, we obtain better convergence results for Muon in (3).*

**Practical Implementations of ASGO.** We also provide Algorithm 2, a practical implementation of ASGO inspired by Adam [Kingma and Ba, 2014] and distributed Shampoo [Shi et al., 2023], together with a memory efficient diagonal variant of ASGO, named DASGO in Algorithm 3. DASGO is basically a light-weight optimizer with the preconditioner  $\Lambda_t$  of ASGO being diagonalized, which is efficient in both memory and computations. Please refer to Appendix B for details.

## 7 Empirical Results

We empirically evaluate the effectiveness of ASGO (Algorithm 2) and DASGO (Algorithm 3) on pretraining and finetuning tasks for Large Language (LL) models. We compare the methods against established optimizers, including AdamW [Kingma and Ba, 2014, Loshchilov and Hutter, 2017], Shampoo [Gupta et al., 2018], and Muon [Jordan et al., 2024]. Several important implementation details should be noted for fair comparison. First, since Muon is designed to operate exclusively on matrix parameters, we follow Jordan et al. [2024] and apply AdamW update rules to all 1D parameters within the Muon optimizer to ensure that it can handle the complete model.

All experiments were conducted using NVIDIA V100s SMX2 GPUs. Specifically, for the larger-scale pretraining of GPT2, we utilized a configuration of four V100 GPUs, while other experiments were performed on a single V100 GPU.

### 7.1 Pretraining NanoGPT

We first conducted experiments using the NanoGPT architecture on the Shakespeare character dataset, following the configuration in [Karpathy, 2022]. To ensure a fair comparison, we maintained consistent hyperparameter (HP) settings varying only those parameters that significantly impacted optimizer performance, i.e., learning rate, 1st and 2nd order moment coefficients ( $\beta_1$  and  $\beta_2$ ) and so

<sup>1</sup>A proof of this equivalence can be found in Appendix G.

on)<sup>2</sup>. For consistency across all optimization methods, we employ the OneCycleLR learning rate schedule, which has been shown to provide stable convergence properties in deep learning tasks. Figure 1 presents a comparison of the pretraining performance of ASGO and DASGO with that of Shampoo, Muon and AdamW on the NanoGPT model. See Appendix C for a plot of the training loss.

Examining both test and training loss curves, ASGO consistently outperforms Shampoo despite requiring only half the memory consumption and computational effort, which highlights ASGO’s practical advantages for training language models. Furthermore, ASGO and Muon achieve the lowest final training and test losses, outperforming all other methods. This consistent performance between ASGO and Muon aligns well with our discussions in Section 6. Moreover, The lightweight DASGO optimizer achieves competitive results against AdamW in both training and test loss metrics. DASGO demonstrates particularly strong performance during the initial training phase (first 200 training steps, which is about the first two epochs), but eventually exhibits a performance gap with ASGO. We will discuss this performance gap in Section 7.2.

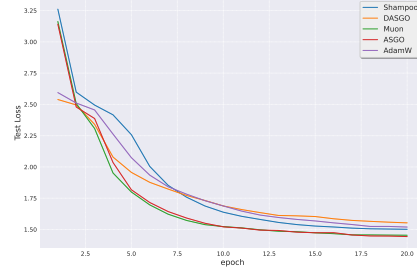

Figure 1: Validation Loss for NanoGPT

## 7.2 Pretraining GPT2

To further evaluate the efficacy of ASGO and DASGO, we extended our investigation to larger-scale pretraining tasks. We adopted the configuration of the GPT2 model as described by [Karpathy, 2022]. In this setting, the GPT2 model comprises 12 Transformer blocks, each with a hidden dimension of 768. Consequently, there are 12 projection layers with dimensions 768×2304. In each of these layers alone, Shampoo necessitates storing two matrices of size 768×768 and two matrices of size 2304×2304 for its state. In contrast, ASGO requires storing only two 768×768 matrices, corresponding to the preconditioning and inverse preconditioning factors. This substantial difference in memory requirements rendered Shampoo impractical for our large-scale GPT2 pretraining experiments, preventing us from obtaining meaningful results within our computational constraints. Therefore, we do not report Shampoo’s performance in this setting.

To ensure a fair comparison, we carefully tuned the learning rates and  $\beta_2$  values (where applicable) for all optimizers (tuning details are provided in Section C). Furthermore, we employed a learning rate schedule consisting of 200 linear warm-up steps followed by a cosine decay, which is a common practice for training LLM models. Figure 2a and Table 1 present a comparison of the training and validation loss achieved by ASGO and DASGO against Muon and AdamW on the GPT2 model. The training loss curves reveal that ASGO achieves a lower final training loss compared to AdamW in the pretraining task, suggesting superior optimization. This observation is further corroborated by the validation loss (Table 1), where ASGO’s performance (3.87) is better than AdamW’s (3.96). Interestingly, ASGO’s performance appears more similar to Muon (3.82) in terms of final loss, although ASGO exhibits a slightly higher validation loss than Muon.

Table 1: Pretraining GPT2 Validation Loss

| AdamW | Muon | ASGO | DASGO |
|-------|------|------|-------|
| 3.96  | 3.82 | 3.87 | 5.23  |

ASGO demonstrates potential advantages over Muon. As depicted in Figure 2a, ASGO shows a faster initial decrease in training loss. Furthermore, our learning rate sensitivity analysis (Figure 2b), with tested candidates  $[10^{-3}, 5 \times 10^{-3}, 10^{-2}, 3 \times 10^{-2}, 5 \times 10^{-2}, 7 \times 10^{-2}, 10^{-1}, 5 \times 10^{-1}]$  using optimal settings for Muon and ASGO suggests that ASGO might be more robust to learning rate selection. Specifically, at higher learning rates (e.g.,  $10^{-1}, 5 \times 10^{-1}$ ), ASGO maintains relatively stable training while Muon exhibits instability. These observations – faster initial convergence and a potentially wider stable learning rate regime for ASGO – are consistent with characteristics often associated with adaptive optimization methods, as discussed in Section 6.

However, DASGO (5.23) underperformed compared to AdamW, Muon, and ASGO in the GPT2 pretraining task. This performance gap was also observed in the pretraining of the smaller NanoGPT model. A primary reason for the difference between DASGO and ASGO likely stems from its

<sup>2</sup>A full description of how these “best” HPs were selected and their values are presented in Appendix C.



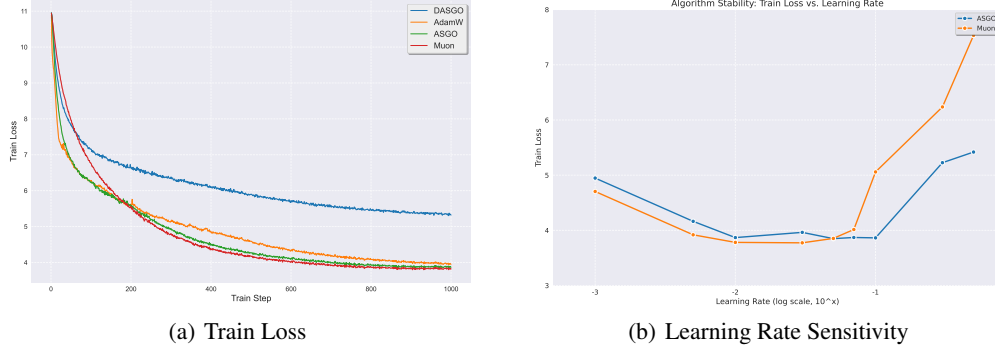

Figure 2: Pretraining Performance and Learning Rate Sensitivity on GPT2

diagonal preconditioning. By only retaining and using only the diagonal elements of the  $GG^T$ , DASGO essentially disregards the inter-dependencies between different parameter gradients from neurons within a layer, moving away from a true matrix-based adaptive approach towards a per-parameter scaling akin to vector-based methods. This highlights the value of preserving non-diagonal elements in the preconditioner matrices, particularly for capturing parameter interactions in attention-based architectures. Nevertheless, DASGO’s significantly reduced memory footprint makes it a compelling option for resource-limited settings where computational efficiency is paramount.

### 7.3 Finetuning GPT2-Large on WikiText-2

To further assess the performance of our proposed optimizers, we conducted fine-tuning experiments on the GPT2-Large(774M) model [Radford et al., 2019] using the WikiText-2 dataset. We explored two distinct fine-tuning objectives:

- First, we fine-tuned GPT2-Large using the standard Causal Language Modeling (CLM) loss, which is the conventional approach for autoregressive language models.
- Second, we also fine-tuned the same GPT2-Large model on WikiText-2 but employed the Fill-in-the-Middle (FIM) training objective, following the setting in [Bavarian et al., 2022]. The FIM objective modifies the training process to enable the model to learn to infill text by rearranging document spans.

To account for statistical variability, we conducted five experimental runs with different random seeds under the same hyperparameter settings. Table 2 presents the average perplexity results after fine-tuning for 2 epochs. For both objectives, we employed a cosine decay learning rate scheduler. Hyperparameter search details and 95% confidence intervals are provided in Table 6. Under the CLM objective, ASGO (13.88 perplexity) and DASGO (13.84 perplexity) achieved lower perplexity than both Muon (13.91 perplexity) and AdamW (14.01 perplexity). This suggests that both ASGO and its memory-efficient variant, DASGO, can be effective for traditional LL modeling fine-tuning. When the model was fine-tuned using the FIM objective, we observed a similar trend, with ASGO (15.66 perplexity) and DASGO (15.45 perplexity) outperforming both Muon (15.93 perplexity) and AdamW (17.46 perplexity). Across both fine-tuning scenarios, ASGO and DASGO demonstrated competitive or superior performance compared to these baseline optimizers.

Table 2: Finetuning GPT2-Large Perplexity

|     | AdamW | Muon  | ASGO  | DASGO |
|-----|-------|-------|-------|-------|
| CLM | 14.01 | 13.91 | 13.88 | 13.84 |
| FIM | 17.46 | 15.93 | 15.66 | 15.45 |

## 8 Conclusions

In this paper, we proposed a novel algorithm ASGO, which achieves significantly better convergence rates compared to full-matrix AdaGrad and Shampoo. Based on the theory, we demonstrated that ASGO can benefit from low-rank gradients and block-wise diagonal Hessians, which are widely observed structured properties of DNNs. We further proposed some practical modifications to ASGO, and verified its effectiveness empirically. Currently, ASGO still has two major limitations: 1) computationally intensive compared to Adam because of the matrix operation; 2) it is not straightforward to extend the algorithm to apply to tensors. We plan to look into these issues in future work.

## References

- Tsuyoshi Ando, Chi-Kwong Li, and Roy Mathias. Geometric means. *Linear algebra and its applications*, 385:305–334, 2004.
- Achraf Bahamou, Donald Goldfarb, and Yi Ren. A mini-block fisher method for deep neural networks, 2022. URL <https://arxiv.org/abs/2202.04124>.
- Mohammad Bavarian, Heewoo Jun, Nikolas Tezak, John Schulman, Christine McLeavey, Jerry Tworek, and Mark Chen. Efficient training of language models to fill in the middle, 2022. URL <https://arxiv.org/abs/2207.14255>.
- James Bergstra and Yoshua Bengio. Random search for hyper-parameter optimization. *Journal of Machine Learning Research*, 13(10):281–305, 2012. URL <http://jmlr.org/papers/v13/bergstra12a.html>.
- Jeremy Bernstein and Laker Newhouse. Modular duality in deep learning. *arXiv preprint arXiv:2410.21265*, 2024a.
- Jeremy Bernstein and Laker Newhouse. Old optimizer, new norm: An anthology. *arXiv preprint arXiv:2409.20325*, 2024b.
- Jeremy Bernstein, Yu-Xiang Wang, Kamyar Azizzadenesheli, and Animashree Anandkumar. signsgd: Compressed optimisation for non-convex problems. In *International Conference on Machine Learning*, pages 560–569. PMLR, 2018.
- Tom Brown, Benjamin Mann, Nick Ryder, Melanie Subbiah, Jared D Kaplan, Prafulla Dhariwal, Arvind Neelakantan, Pranav Shyam, Girish Sastry, Amanda Askell, Sandhini Agarwal, Ariel Herbert-Voss, Gretchen Krueger, Tom Henighan, Rewon Child, Aditya Ramesh, Daniel Ziegler, Jeffrey Wu, Clemens Winter, Chris Hesse, Mark Chen, Eric Sigler, Mateusz Litwin, Scott Gray, Benjamin Chess, Jack Clark, Christopher Berner, Sam McCandlish, Alec Radford, Ilya Sutskever, and Dario Amodei. Language models are few-shot learners. In H. Larochelle, M. Ranzato, R. Hadsell, M.F. Balcan, and H. Lin, editors, *Advances in Neural Information Processing Systems*, volume 33, pages 1877–1901. Curran Associates, Inc., 2020. URL <https://proceedings.neurips.cc/paper/2020/file/1457c0d6bfc4967418bfb8ac142f64a-Paper.pdf>.
- Dami Choi, Christopher J Shallue, Zachary Nado, Jaehoon Lee, Chris J Maddison, and George E Dahl. On empirical comparisons of optimizers for deep learning. *arXiv preprint arXiv:1910.05446*, 2019.
- Ronan Collobert. Large scale machine learning. 2004.
- Romain Cosson, Ali Jadbabaie, Anuran Makur, Amirhossein Reisizadeh, and Devavrat Shah. Low-rank gradient descent. *IEEE Open Journal of Control Systems*, 2:380–395, 2023.
- Michael Crawshaw, Mingrui Liu, Francesco Orabona, Wei Zhang, and Zhenxun Zhuang. Robustness to unbounded smoothness of generalized signsgd. *Advances in neural information processing systems*, 35:9955–9968, 2022.
- Ashok Cutkosky and Harsh Mehta. Momentum improves normalized sgd. In *International conference on machine learning*, pages 2260–2268. PMLR, 2020.
- Jacob Devlin, Ming-Wei Chang, Kenton Lee, and Kristina Toutanova. Bert: Pre-training of deep bidirectional transformers for language understanding. *arXiv preprint arXiv:1810.04805*, 2018.
- John Duchi, Elad Hazan, and Yoram Singer. Adaptive subgradient methods for online learning and stochastic optimization. *Journal of machine learning research*, 12(7), 2011.
- Vladimir Feinberg, Xinyi Chen, Y Jennifer Sun, Rohan Anil, and Elad Hazan. Sketchy: Memory-efficient adaptive regularization with frequent directions. *Advances in Neural Information Processing Systems*, 36:75911–75924, 2023.
- Guillaume Garrigos and Robert M Gower. Handbook of convergence theorems for (stochastic) gradient methods. *arXiv preprint arXiv:2301.11235*, 2023.

426 Vineet Gupta, Tomer Koren, and Yoram Singer. A unified approach to adaptive regularization in  
427 online and stochastic optimization. *arXiv preprint arXiv:1706.06569*, 2017.

428 Vineet Gupta, Tomer Koren, and Yoram Singer. Shampoo: Preconditioned stochastic tensor optimiza-  
429 tion. In *International Conference on Machine Learning*, pages 1842–1850. PMLR, 2018.

430 Guy Gur-Ari, Daniel A Roberts, and Ethan Dyer. Gradient descent happens in a tiny subspace. *arXiv*  
431 *preprint arXiv:1812.04754*, 2018.

432 Nicholas J. Higham. *Functions of Matrices: Theory and Computation*. Society for Industrial and  
433 Applied Mathematics, United States, 2008. ISBN 9780898717778. ISBN 978-0-898716-46-7.

434 Edward J Hu, Yelong Shen, Phillip Wallis, Zeyuan Allen-Zhu, Yuanzhi Li, Shean Wang, Lu Wang,  
435 Weizhu Chen, et al. Lora: Low-rank adaptation of large language models. *ICLR*, 1(2):3, 2022.

436 Qiushi Huang, Tom Ko, Zhan Zhuang, Lilian Tang, and Yu Zhang. Hira: Parameter-efficient hadamard  
437 high-rank adaptation for large language models. In *The Thirteenth International Conference on*  
438 *Learning Representations*, 2025.

439 Ruichen Jiang, Devyani Maladkar, and Aryan Mokhtari. Convergence analysis of adaptive gradient  
440 methods under refined smoothness and noise assumptions. *arXiv preprint arXiv:2406.04592*,  
441 2024a.

442 Ting Jiang, Shaohan Huang, Shengyue Luo, Zihan Zhang, Haizhen Huang, Furu Wei, Weiwei Deng,  
443 Feng Sun, Qi Zhang, Deqing Wang, et al. Mora: High-rank updating for parameter-efficient  
444 fine-tuning. *arXiv preprint arXiv:2405.12130*, 2024b.

445 Keller Jordan, Yuchen Jin, Vlado Boza, You Jiacheng, Franz Cesista, Laker Newhouse, and Jeremy  
446 Bernstein. Muon: An optimizer for hidden layers in neural networks, 2024. URL <https://kellerjordan.github.io/posts/muon/>.

447 Sai Praneeth Karimireddy, Quentin Rebjock, Sebastian Stich, and Martin Jaggi. Error feedback  
448 fixes signsgd and other gradient compression schemes. In *International Conference on Machine*  
449 *Learning*, pages 3252–3261. PMLR, 2019.

451 Andrej Karpathy. NanoGPT. <https://github.com/karpathy/nanoGPT>, 2022.

452 Diederik P Kingma and Jimmy Ba. Adam: A method for stochastic optimization. *arXiv preprint*  
453 *arXiv:1412.6980*, 2014.

454 Frederik Kunstner, Jacques Chen, Jonathan Wilder Lavington, and Mark Schmidt. Noise is not the  
455 main factor behind the gap between sgd and adam on transformers, but sign descent might be.  
456 *arXiv preprint arXiv:2304.13960*, 2023.

457 Tim Large, Yang Liu, Minyoung Huh, Hyojin Bahng, Phillip Isola, and Jeremy Bernstein. Scalable  
458 optimization in the modular norm. *arXiv preprint arXiv:2405.14813*, 2024.

459 Kfir Y Levy, Alp Yurtsever, and Volkan Cevher. Online adaptive methods, universality and accelera-  
460 tion. *Advances in neural information processing systems*, 31, 2018.

461 Jiaxiang Li and Mingyi Hong. A note on the convergence of muon and further. *arXiv preprint*  
462 *arXiv:2502.02900*, 2025.

463 Vladislav Lialin, Namrata Shivagunde, Sherin Muckatira, and Anna Rumshisky. Relora: High-rank  
464 training through low-rank updates. *arXiv preprint arXiv:2307.05695*, 2023.

465 Wu Lin, Felix Dangel, Runa Eschenhagen, Juhan Bae, Richard E. Turner, and Alireza Makhzani.  
466 Can we remove the square-root in adaptive gradient methods? a second-order perspective, 2024.  
467 URL <https://arxiv.org/abs/2402.03496>.

468 Jingyuan Liu, Jianlin Su, Xingcheng Yao, Zhejun Jiang, Guokun Lai, Yulun Du, Yidao Qin, Weixin  
469 Xu, Enzhe Lu, Junjie Yan, et al. Muon is scalable for llm training. *arXiv preprint arXiv:2502.16982*,  
470 2025a.

471 Liming Liu, Zhenghao Xu, Zixuan Zhang, Hao Kang, Zichong Li, Chen Liang, Weizhu Chen, and  
472 Tuo Zhao. Cosmos: A hybrid adaptive optimizer for memory-efficient training of llms. *arXiv*  
473 *preprint arXiv:2502.17410*, 2025b.

474 Yuxing Liu, Rui Pan, and Tong Zhang. Adagrad under anisotropic smoothness. *arXiv preprint*  
475 *arXiv:2406.15244*, 2024.

476 Ilya Loshchilov and Frank Hutter. Decoupled weight decay regularization. *arXiv preprint*  
477 *arXiv:1711.05101*, 2017.

478 Karl Löwner. Über monotone matrixfunktionen. *Mathematische Zeitschrift*, 38(1):177–216, 1934.

479 James Martens and Roger Grosse. Optimizing neural networks with kronecker-factored approximate  
480 curvature. In *International conference on machine learning*, pages 2408–2417. PMLR, 2015.

481 Depen Morwani, Itai Shapira, Nikhil Vyas, Eran Malach, Sham Kakade, and Lucas Janson. A new  
482 perspective on shampoo’s preconditioner. *arXiv preprint arXiv:2406.17748*, 2024.

483 Yurii Nesterov et al. *Lectures on convex optimization*, volume 137. Springer, 2018.

484 Son Nguyen, Bo Liu, Lizhang Chen, and Qiang Liu. Improving adaptive moment optimization via  
485 preconditioner diagonalization. *arXiv preprint arXiv:2502.07488*, 2025.

486 Long Ouyang, Jeffrey Wu, Xu Jiang, Diogo Almeida, Carroll Wainwright, Pamela Mishkin, Chong  
487 Zhang, Sandhini Agarwal, Katarina Slama, Alex Ray, et al. Training language models to follow  
488 instructions with human feedback. *Advances in Neural Information Processing Systems*, 35:  
489 27730–27744, 2022.

490 Alec Radford, Jeffrey Wu, Rewon Child, David Luan, Dario Amodei, Ilya Sutskever, et al. Language  
491 models are unsupervised multitask learners. *OpenAI blog*, 1(8):9, 2019.

492 Yi Ren and Donald Goldfarb. Tensor normal training for deep learning models, 2021. URL  
493 <https://arxiv.org/abs/2106.02925>.

494 Levent Sagun, Leon Bottou, and Yann LeCun. Eigenvalues of the hessian in deep learning: Singularity  
495 and beyond. *arXiv preprint arXiv:1611.07476*, 2016.

496 Levent Sagun, Utku Evci, V Ugur Guney, Yann Dauphin, and Leon Bottou. Empirical analysis of the  
497 hessian of over-parametrized neural networks. *arXiv preprint arXiv:1706.04454*, 2017.

498 Noam Shazeer and Mitchell Stern. Adafactor: Adaptive learning rates with sublinear memory cost.  
499 In *International Conference on Machine Learning*, pages 4596–4604. PMLR, 2018.

500 Hao-Jun Michael Shi, Tsung-Hsien Lee, Shintaro Iwasaki, Jose Gallego-Posada, Zhijing Li, Kaushik  
501 Rangadurai, Dheevatsa Mudigere, and Michael Rabbat. A distributed data-parallel pytorch im-  
502 plementation of the distributed shampoo optimizer for training neural networks at-scale. *arXiv*  
503 *preprint arXiv:2309.06497*, 2023.

504 Matthew Streeter and H Brendan McMahan. Less regret via online conditioning. *arXiv preprint*  
505 *arXiv:1002.4862*, 2010.

506 Tao Sun, Qingsong Wang, Dongsheng Li, and Bao Wang. Momentum ensures convergence of  
507 signsgd under weaker assumptions. In *International Conference on Machine Learning*, pages  
508 33077–33099. PMLR, 2023.

509 Hugo Touvron, Louis Martin, and Kevin Stone. Llama 2: Open Foundation and Fine-Tuned Chat  
510 Models.

511 Hugo Touvron, Thibaut Lavril, Gautier Izacard, Xavier Martinet, Marie-Anne Lachaux, Timothée  
512 Lacroix, Baptiste Rozière, Naman Goyal, Eric Hambro, Faisal Azhar, Aurelien Rodriguez, Armand  
513 Joulin, Edouard Grave, and Guillaume Lample. LLaMA: Open and Efficient Foundation Language  
514 Models. 2023. doi: 10.48550/ARXIV.2302.13971. URL [https://arxiv.org/abs/2302.](https://arxiv.org/abs/2302.13971)  
515 13971. Publisher: arXiv Version Number: 1.

516 Nikhil Vyas, Depen Morwani, Rosie Zhao, Itai Shapira, David Brandfonbrener, Lucas Janson,  
517 and Sham Kakade. Soap: Improving and stabilizing shampoo using adam. *arXiv preprint*  
518 *arXiv:2409.11321*, 2024.

519 Hongyi Wang, Scott Sievert, Shengchao Liu, Zachary Charles, Dimitris Papailiopoulos, and Stephen  
520 Wright. Atomo: Communication-efficient learning via atomic sparsification. *Advances in neural*  
521 *information processing systems*, 31, 2018.

522 Rachel Ward, Xiaoxia Wu, and Leon Bottou. Adagrad stepsizes: Sharp convergence over nonconvex  
523 landscapes. *The Journal of Machine Learning Research*, 21(1):9047–9076, 2020.

524 Yikai Wu, Xingyu Zhu, Chenwei Wu, Annie Wang, and Rong Ge. Dissecting hessian: Understanding  
525 common structure of hessian in neural networks. *arXiv preprint arXiv:2010.04261*, 2020.

526 Shuo Xie, Mohamad Amin Mohamadi, and Zhiyuan Li. Adam exploits  $\ell_\infty$ -geometry of loss landscape  
527 via coordinate-wise adaptivity. *arXiv preprint arXiv:2410.08198*, 2024.

528 Shuo Xie, Tianhao Wang, Sashank Reddi, Sanjiv Kumar, and Zhiyuan Li. Structured preconditioners  
529 in adaptive optimization: A unified analysis. *arXiv preprint arXiv:2503.10537*, 2025.

530 Yuege Xie, Xiaoxia Wu, and Rachel Ward. Linear convergence of adaptive stochastic gradient  
531 descent. In *International conference on artificial intelligence and statistics*, pages 1475–1485.  
532 PMLR, 2020.

533 Greg Yang, James B Simon, and Jeremy Bernstein. A spectral condition for feature learning. *arXiv*  
534 *preprint arXiv:2310.17813*, 2023.

535 Yang You, Jing Li, Sashank Reddi, Jonathan Hseu, Sanjiv Kumar, Srinadh Bhojanapalli, Xiaodan  
536 Song, James Demmel, Kurt Keutzer, and Cho-Jui Hsieh. Large batch optimization for deep  
537 learning: Training bert in 76 minutes. *arXiv preprint arXiv:1904.00962*, 2019.

538 Yushun Zhang, Congliang Chen, Tian Ding, Ziniu Li, Ruoyu Sun, and Zhi-Quan Luo. Why trans-  
539 formers need adam: A hessian perspective. *arXiv preprint arXiv:2402.16788*, 2024a.

540 Yushun Zhang, Congliang Chen, Ziniu Li, Tian Ding, Chenwei Wu, Diederik P Kingma, Yinyu Ye,  
541 Zhi-Quan Luo, and Ruoyu Sun. Adam-mini: Use fewer learning rates to gain more. *arXiv preprint*  
542 *arXiv:2406.16793*, 2024b.

543 Jiawei Zhao, Florian Schäfer, and Anima Anandkumar. Zero initialization: Initializing neural  
544 networks with only zeros and ones. *arXiv preprint arXiv:2110.12661*, 2021.

545 Jiawei Zhao, Zhenyu Zhang, Beidi Chen, Zhangyang Wang, Anima Anandkumar, and Yuandong  
546 Tian. Galore: Memory-efficient llm training by gradient low-rank projection. *arXiv preprint*  
547 *arXiv:2403.03507*, 2024.

548 Martin Zinkevich. Online convex programming and generalized infinitesimal gradient ascent. In  
549 *Proceedings of the 20th international conference on machine learning (icml-03)*, pages 928–936,  
550 2003.

## A Additional Related Work

**Optimization with Matrix Structure.** Much recent work has focused on improving full-matrix AdaGrad and Shampoo. Feinberg et al. [2023] uses a sketching-based approach to approximate the full-matrix AdaGrad preconditioner with lower memory cost. Morwani et al. [2024] provides theoretical intuition and empirical evidence to claim that Shampoo should use the  $-1/2$  power in its preconditioners to better approximate the Empirical Fisher (EF) matrix. Vyas et al. [2024] demonstrates that Shampoo is like doing Adafactor in the eigenspace of gradients and proposes a novel algorithm, SOAP, that performs Adam in this eigenspace. SOAP is observed to achieve better performance than Adam and Shampoo, but suffers from a high computation load per iteration. Galore [Zhao et al., 2024] shares a similar algorithmic design with SOAP with extra focus on lowering memory costs. Muon [Jordan et al., 2024] follows this line of work, using a steepest descent (in the spectral norm) framework, which it shows to be scalable and effective in training large foundation models [Liu et al., 2025a]. Large et al. [2024], Bernstein and Newhouse [2024a] propose the modular approach that has also been applied to improve Muon. More recently, Nguyen et al. [2025] proposes AdaDiag, which may be viewed as SOAP doing SVD without gradient accumulation. Liu et al. [2025b] proposes COSMOS, a combination of SOAP and Muon, that trades off between performance and computational efficiency.

**Rank of Gradients and Weight Updates.** It has been widely observed that gradients are naturally low-rank in DNNs, even when a large batch size is employed [Gur-Ari et al., 2018, Zhao et al., 2021, Yang et al., 2023, Cosson et al., 2023]. This property has been widely utilized for computation and memory efficiency in training [Wang et al., 2018, Cosson et al., 2023, Zhao et al., 2024]. On the other hand, the rank of the total weight update  $\Delta W = W_T - W_0$ , depends a lot on the training method. If we use LoRA [Hu et al., 2022],  $\Delta W$  is determined to be low-rank. However, in pretraining or even many complex fine-tuning tasks, LoRA’s performance is much worse than methods that produce high-rank weight updates like full-parameter training, which is conjectured to be due to the weight update rank [Lialin et al., 2023, Jiang et al., 2024b, Huang et al., 2025].

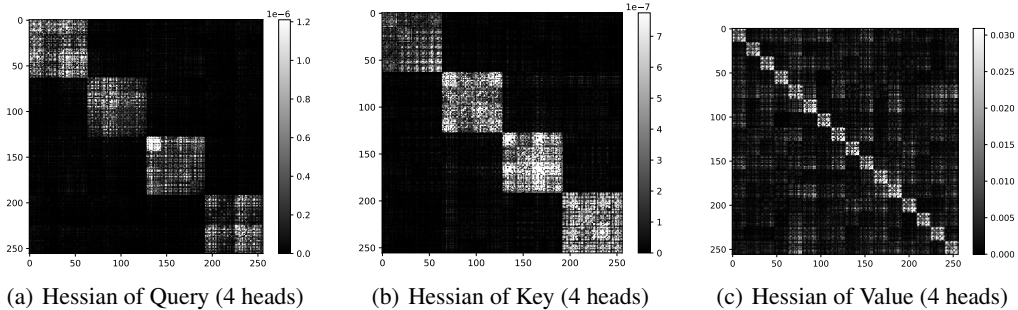

Figure 3: This figure is from Zhang et al. [2024b]. It depicts the Hessian of different parameter blocks in a small Transformer at the 1% training step. The near-block-diagonal structure maintains throughout training. But different parameter blocks have different numbers of small dense matrices, where Query and Key correspond to the number of heads.

**Block-wise Diagonal Hessian.** It has been observed that the Hessian of a neural network tends to be block-wise diagonal with each block corresponding to a neuron both in experiments and theory for small MLPs [Collobert, 2004]. Zhang et al. [2024a,b] recently numerically verified this property in small transformers, and as illustrated in Figure 4, further empirically showed that transformers may exhibit heterogeneity between blocks, while CNNs may not.

**Concurrent Work.** When we were finishing writing this paper, we noticed that the paper [Xie et al., 2025], which had just appeared on arXiv, proposes and studies an algorithm, referred to as One-Sided Shampoo, that is identical to ASGO. Although the theoretical techniques and convergence results proved in [Xie et al., 2025] and here are very similar in general, there are still some notable differences between the two works. First, the motivations are different. In Xie et al. [2025], the authors develop their method from the unified preconditioning method framework AdaptReg [Gupta et al., 2017] and mainly highlight its superior convergence results compared to Shampoo and full-matrix AdaGrad. In our paper, we focus more on theoretically discussing how ASGO can utilize the

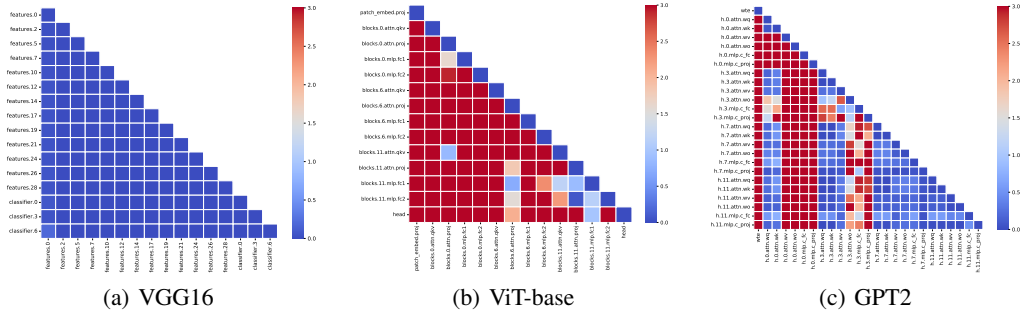

Figure 4: This figure is from Zhang et al. [2024a,b], calculating the Jensen-Shannon (JS) distance between two eigenvalue densities of all possible block pairs at initialization. It shows that JS distance of blockwise spectra in CNNs is significantly smaller than that in Transformers.

structured properties of optimization problems including low-rank gradients and block-wise diagonal Hessians, to highlight the potential of ASGO as a practical algorithm for training deep learning models. Second, our empirical results provide evidence that ASGO can perform well in practical tasks, whereas Xie et al. [2025] focuses on convex settings and examines One-Sided Shampoo only on linear regression. Moreover, our implementation includes specialized designs for Transformer architectures (particularly query/key) to improve performance on deep learning training tasks. As a direct byproduct of our main algorithm, we also developed a lightweight diagonal version named DASGO to trade off memory consumption and performance. Third, Xie et al. [2025] focuses primarily on developing a general proof framework applicable to multiple optimizers including One-Sided Shampoo, whereas our work specifically examines the theoretical and practical benefits of ASGO. To conclude, both works contribute to a better understanding of ASGO/One-Sided Shampoo.

## B More Discussions on ASGO

**A practical implementation of ASGO.** We present a practical implementation of ASGO in Algorithm 2. Our implementation incorporates several common modifications to enhance computational efficiency and stability.

---

### Algorithm 2 A Practical Implementation of ASGO

---

```

1: Input:  $W_0 \in \mathbb{R}^{m \times n}$ , lr schedule  $\{\eta_t\}$ , momentums  $\beta_1, \beta_2 \in [0, 1)$ , batch size  $M \in \mathbb{N}$ , update
   interval  $\tau \in \mathbb{N}$ ,  $\epsilon \in \mathbb{R}$  ( $\epsilon$  should be small, similar to the  $\epsilon$  for Adam or AdaGrad)
2: Initialize  $M_{-1} = 0 \in \mathbb{R}^{m \times n}$ ,  $V_{-1} = 0 \in \mathbb{R}^{n \times n}$  or  $\mathbb{R}^{m \times m}$ 
3: for  $t = 0$  to  $T - 1$  do
4:   Sample mini-batch  $\mathcal{B}_t$  with  $|\mathcal{B}_t| \equiv M$  uniformly
5:    $G_t = \frac{1}{M} \sum_{\xi \in \mathcal{B}_t} \nabla_W f(W_t; \xi)$  ▷ Compute stochastic gradient
6:    $M_t = \beta_1 M_{t-1} + (1 - \beta_1) G_t$  ▷ Accumulate momentum
7:   if  $m < n$  then
8:      $V_t = \beta_2 V_{t-1} + (1 - \beta_2) G_t G_t^\top$ 
9:   else
10:     $V_t = \beta_2 V_{t-1} + (1 - \beta_2) G_t^\top G_t$  ▷ Use exponential moving average to update  $V_t$ 
11:   end if
12:   if  $\text{mod}(t, \tau) = 0$  ▷ Update  $\Lambda_t^{\text{inv}}$  every  $\tau$  iterations
13:      $\Lambda_t^{\text{inv}} = (V_t + \epsilon I_n)^{-\frac{1}{2}}$ 
14:   else
15:      $\Lambda_t^{\text{inv}} = \Lambda_{t-1}^{\text{inv}}$ 
16:   end if
17:   if  $m < n$  then
18:      $W_{t+1} = W_t - \eta_t \Lambda_t^{\text{inv}} M_t$ 
19:   else
20:      $W_{t+1} = W_t - \eta_t M_t \Lambda_t^{\text{inv}}$  ▷ Precondition the 1st momentum dynamically
21:   end if
22: end for

```

---

(i) A key modification is the adaptive selection of the preconditioning side. Instead of fixing the preconditioner to one side, we dynamically choose to precondition on the side corresponding to the smaller dimension of the gradient matrix  $G_t$  in  $\mathbb{R}^{D_1 \times D_2}$ . Specifically, if  $D_1 < D_2$ , the preconditioner is formed from  $G_t G_t^T$  and applied from the left; otherwise (if  $D_2 < D_1$ ), it is formed from  $G_t^T G_t$  and applied from the right. This strategy, which aims to minimize computational overhead associated with the preconditioner, is also used by the Muon Optimizer. For 1D parameters (i.e., gradient vectors  $g$ ), where one dimension is 1, this "smaller dimension" rule naturally leads to a scalar preconditioner (derived from  $g^T g$ ). This effectively implements a form of AdaGrad-Norm [Streeter and McMahan, 2010, Ward et al., 2020] for these vector parameters. Consequently, this unified approach allows ASGO to efficiently handle all parameter structures, including 1D vectors, without needing a separate optimizer (like AdamW [Loshchilov and Hutter, 2017]) that is often employed for such parameters in methods like Muon [Jordan et al., 2024]. The convergence guarantees can be extended to this adaptive side selection, as each choice (left or right preconditioning) maintains a valid ASGO-like update structure (operating on  $W$  or  $W^T$ , respectively)<sup>3</sup>.

(ii) Exponential moving averages are used to update the preconditioner and incorporate momentum, following established practice, which results in Adam’s improvements across various tasks over AdaGrad.

(iii) The preconditioner matrix is inverted every  $\tau$  iterations, as is done in distributed Shampoo [Shi et al., 2023] and SOAP [Vyas et al., 2024]. This modification increases memory requirements but substantially reduces computational overhead while improving algorithmic stability.

**Special Design for Transformers.** Furthermore, we introduce a specialized adaptation of ASGO for query and key matrices in attention layers. Recent work by Zhang et al. [2024b] has demonstrated that the Hessian structure of query and key layers differs significantly from conventional MLP layers. As illustrated in Figure 3, the number of dense blocks corresponds to the number of attention heads rather than output neurons. This observation aligns with the forward computation of multi-head attention, where attention scores are computed independently across different subspaces, suggesting that query and key parameters could be optimized in a head-wise manner. To leverage this insight, we reshape query and key parameters from matrices in  $\mathbb{R}^{n \times hd}$  to three-dimensional tensors  $\mathbb{R}^{h \times n \times d}$ , and apply our optimization algorithm independently to each head’s subspace. This restructuring reduces both memory consumption and computational complexity by decreasing the matrix size from  $O(h^2 d^2)$  into  $O(hd^2)$ . For instance, in NanoGPT [Karpathy, 2022], this adjustment reduces the preconditioning size of a single query/key parameter from approximately  $10^6$  elements into  $10^5$ . The empirical performance of this modification is evaluated in Section C.

**A Diagonal Variant of ASGO.** Drawing inspiration from Duchi et al. [2011], we also implement a variant of ASGO using diagonal matrices, which we denote as DASGO, presented in Algorithm 3. DASGO can be viewed as a lightweight version of ASGO, which eliminates the need to compute the inverse square root of full matrices, and reduces memory requirements to a level comparable with Adam-mini [Zhang et al., 2024b]. It also makes the choice of which side of  $M_t$  to precondition unimportant in terms of computational effort, in contrast to ASGO. For DASGO, we choose to apply the diagonal preconditioner on the right side, aligning with the neuron architecture in DNNs. However, since DASGO only employs a diagonal preconditioner, it fails to recover the superior theoretical properties of ASGO under block-wise diagonal Hessian settings. We further empirically examine this tradeoff in Section 7.

## C Details of Empirical Experiments

### C.1 Pretraining NanoGPT

**Experimental Setup:** As an initial experiment, we compared the performance of ASGO, DASGO, Muon, Shampoo, and Adam-W for training NanoGPT, which consists of 6 Transformer layers, 6 attention heads, and an embedding dimension of 384, on the Shakespeare character-level dataset with a sequence length of 256 tokens. For all algorithms, we trained the model for 20 epochs, where each epoch contained 128 steps, using a batch size 128 and the OneCycle learning rate (lr) schedule.

<sup>3</sup>For instance, applying ASGO with right-side preconditioning to  $W$  is equivalent to applying the original left-side ASGO formulation to  $W^T$ .



**Algorithm 3** Implementation of DASGO (Diagonal Adaptive Structured Gradient Optimization)

---

```

1: Input:  $W_0 \in \mathbb{R}^{m \times n}$ ,  $\epsilon \in \mathbb{R}$ , lr schedule  $\{\eta_t\}$ , momentums  $\beta_1, \beta_2 \in [0, 1)$ , and batch size  $M \in \mathbb{N}$ 
2: Initialize  $M_{-1} = 0 \in \mathbb{R}^{m \times n}$ ,  $v_{-1} = 0 \in \mathbb{R}^n$ 
3: for  $t = 0$  to  $T - 1$  do
4:   Sample mini-batch  $\mathcal{B}_t$  with  $|\mathcal{B}_t| \equiv M$  uniformly
5:    $G_t = \frac{1}{M} \sum_{\xi \in \mathcal{B}_t} \nabla_W f(W_t; \xi)$  ▷ Compute stochastic gradient
6:    $M_t = \beta_1 M_{t-1} + (1 - \beta_1) G_t$  ▷ Accumulate momentum
7:    $v_t = \beta_2 v_{t-1} + (1 - \beta_2) \text{diag}(G_t^\top G_t)$  ▷ Use exponential moving average to update vector  $V_t$ 
8:    $W_{t+1} = W_t - \eta_t M_t \text{diag}(v_t + \epsilon)^{-\frac{1}{2}}$  ▷ Precondition by a diagonal Matrix from right side
9: end for

```

---

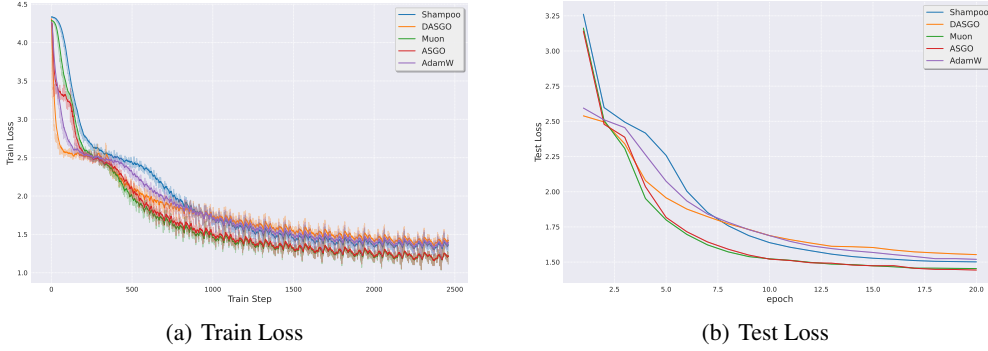

Figure 5: Train Loss and Test Loss on the NanoGPT and Shakespeare Character Dataset

Before discussing hyperparameter (HP) tuning, we note that recent research [Shi et al., 2023, Morwani et al., 2024, Lin et al., 2024] has suggested treating the inverse order (IO) in Shampoo’s preconditioner as a tunable HP rather than using the standard value of  $-1/4$ . Notably, Morwani et al. [2024] demonstrated that Shampoo with  $\text{IO} = -1/2$  provides a superior approximation of the full-matrix AdaGrad optimizer. Consequently, we treated the IO as a Shampoo HP in our pretraining experiments. Additionally, Shampoo’s performance is highly dependent on the initialization of its preconditioner matrices, as this is crucial for accurately approximating the Empirical Fisher Information Matrix [Morwani et al., 2024]. To address this initialization sensitivity, we implemented a preconditioner warmup phase specifically for Shampoo. Following the methodology in Ren and Goldfarb [2021], we dedicated the first epoch exclusively to accumulating statistics for the preconditioner matrices without updating model parameters. This approach yields a more robust estimation of the preconditioner, which significantly improves the stability of Shampoo during subsequent training iterations. Figure 5 depicts the training loss and validation loss for training NanoGPT with Shampoo, DASGO, Muon, ASGO and Adam-W.

**Hyperparameter Tuning** To ensure optimal performance for each optimizer, we conducted a comprehensive HP search using random search [Bergstra and Bengio, 2012, Choi et al., 2019] within the following predefined ranges: initial lr:  $[10^{-5}, 10^{-1}]$ ;  $\beta_1$ :  $[0.7, 0.99]$ ;  $\beta_2$ :  $[0.7, 0.99]$ ; and selected the warmup factor from the set  $[0.1, 0.15, 0.2, 0.25, 0.3]$ . For the optimizers Shampoo and ASGO, we selected the update frequency  $\tau$  from the set  $[5, 10, 15]$  and for Shampoo, we selected its IO as either  $-1/2$  or  $-1/4$ . HPs were selected based on validation loss after 20 epochs of training. For each optimizer, we performed a random search for 16 hours to find the optimal HP combination. These best HP choices for training NanoGPT are given in Table 3.

**Ablation Study: Impact of Special Query/Key Design** In Appendix B, we highlighted the computational benefits of specialized processing for Query and Key matrices in Transformer architectures. To validate these theoretical advantages empirically, we conducted an ablation study comparing the performance and training stability of ASGO and Muon on pretraining NanoGPT, both with and without the specialized Query-Key processing. We maintained the optimal HP configuration established in Table 3 for all parameters except the learning rate. For each algorithm variant (with and without specialized processing), we randomly sampled learning rates from a log-uniform distribution

Table 3: Hyperparameter selection for NanoGPT experiment

| Optimizer | learning rate | $\beta_1$ | $\beta_2$ | warmup factor | update frequency | inverse order  |
|-----------|---------------|-----------|-----------|---------------|------------------|----------------|
| Muon      | 0.00349       | 0.9881    | N/A       | 0.3           | N/A              | N/A            |
| AdamW     | 0.00450       | 0.9332    | 0.9528    | 0.2           | N/A              | N/A            |
| DASGO     | 0.060         | 0.9584    | 0.9435    | 0.2           | N/A              | N/A            |
| Shampoo   | 0.00593       | 0.9402    | 0.9760    | 0.3           | 15               | $-\frac{1}{4}$ |
| ASGO      | 0.01470       | 0.9541    | 0.8487    | 0.3           | 15               | N/A            |

684 ranging from  $10^{-5}$  to  $10^{-1}$ . Each configuration was trained for 5 epochs on the NanoGPT model,  
 685 after which we recorded the validation loss. This approach allowed us to evaluate both performance  
 686 and robustness to learning rate selection. Figure 6 presents the distribution of validation losses after 5  
 687 epochs for both algorithms. The violin plots<sup>4</sup> reveal several key insights: (1) For ASGO (Figure 6a),  
 688 the benefits of specialized Query-Key processing are substantial. The specialized implementation  
 689 demonstrates a narrower, lower distribution of validation losses (centered around 2.5), indicating  
 690 greater stability across different learning rates. In contrast, the vanilla implementation shows a  
 691 long-tailed distribution extending beyond loss values of 6.0, with several outliers representing training  
 692 instability at certain learning rates. (2) For Muon (Figure 6b), both implementations demonstrate  
 693 nearly identical performance distributions, with their median validation losses and distribution shapes  
 694 showing minimal differences. However, the specialized implementation achieves this comparable  
 695 performance while reducing memory requirements and computational complexity. This represents a  
 696 clear efficiency advantage – the specialized Query-Key processing effectively provides computational  
 697 savings with no performance penalty.

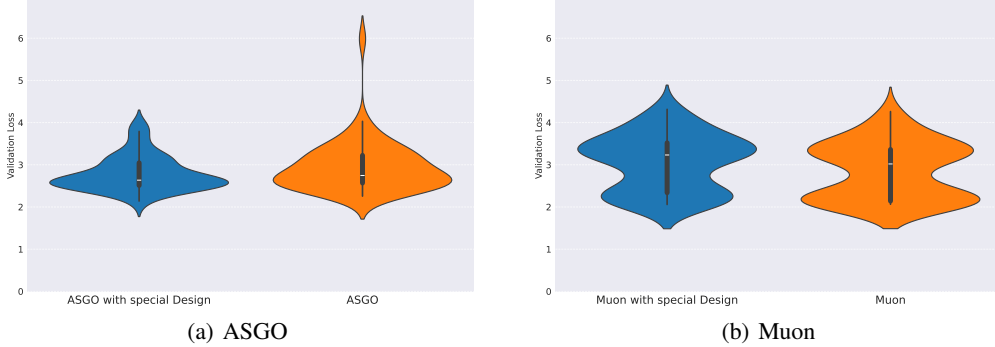

Figure 6: Distribution of validation losses after 5 epochs with varying learning rates.

## 698 C.2 Pretraining GPT2

699 **Experimental Setup:** The model configuration consists of 12 Transformer layers, 12 attention  
 700 heads, and an embedding dimension of 768. The total number of training steps was 1000, with a batch  
 701 size per GPU of 32. The model was trained using Distributed Data Parallel (DDP) on 4 NVIDIA  
 702 V100 GPUs, employing gradient accumulation over 8 steps. To ensure a fair comparison across all  
 703 optimization algorithms, a consistent learning rate schedule was utilized: a linear warmup for the first  
 704 200 steps, followed by a cosine annealing decay to a final learning rate of  $1 \times 10^{-5}$  for the remainder  
 705 of the training process. Training was conducted on the OpenWebText dataset with a sequence length  
 706 of 512 tokens.

707 **Hyperparameter Tuning:** To ensure optimal performance for each optimizer, we conducted a  
 708 hyperparameter search using grid search. The search space for learning rate (lr) and 2nd momentum  
 709  $\beta_2$  (where applicable for the optimizer) included the following values:

- 710 • Learning rate (lr):  $[1 \times 10^{-5}, 1 \times 10^{-4}, 5 \times 10^{-4}, 1 \times 10^{-3}, 5 \times 10^{-3}, 1 \times 10^{-2}, 5 \times$   
 711  $10^{-2}, 0.1, 0.5]$

<sup>4</sup>Violin plot outlines depict empirical probability density; i.e., the width of the shaded area represents the proportion of the data located there. Box plots within a violin plot display the median and inter-quartile range.

- $\beta_2$ : [0.7,0.8,0.9,0.95,0.99]

Optimal hyperparameters were selected based on the validation loss achieved after 1000 training steps. The best hyperparameter choices for pretraining GPT-2 are presented in Table 4.

Table 4: Optimal hyperparameter selection for pretraining GPT-2.

| Optimizer | Learning Rate | $\beta_1$ | $\beta_2$ | Damping $\epsilon$ | Update Freq. ( $\tau$ ) |
|-----------|---------------|-----------|-----------|--------------------|-------------------------|
| Muon      | 0.01          | 0.9       | N/A       | N/A                | N/A                     |
| AdamW     | 0.005         | 0.9       | 0.99      | $1 \times 10^{-6}$ | N/A                     |
| DASGO     | 0.01          | 0.9       | 0.99      | $1 \times 10^{-6}$ | N/A                     |
| ASGO      | 0.1           | 0.9       | 0.95      | $1 \times 10^{-6}$ | 1                       |

### C.3 Finetune GPT2-Large

**Experimental Setup:** We fine-tuned the GPT-2 Large model on the WikiText-2 dataset. We utilized the GPT-2 Large model, which comprises approximately 774 million parameters. This model is a transformer-based language model pretrained on English text using a Causal Language Modeling (CLM) objective, initially developed by OpenAI and was accessed via the Hugging Face Hub. The fine-tuning was performed on the WikiText-2 dataset, a standard benchmark for evaluating language model performance. The dataset was loaded directly using standard library functions. We investigated two distinct fine-tuning objectives:

- Causal Language Modeling (CLM): The conventional autoregressive language modeling task.
- Fill-in-the-Middle (FIM): Adopting the methodology from Bavarian et al. (2022). This objective trains the model to infill masked text spans within a document.

All models were fine-tuned for a total of 2 epochs. For the learning rate, we employed a cosine annealing decay schedule over the course of these 2 epochs, with the learning rate decaying to 0 by the end of training. No warmup phase was used for the fine-tuning learning rate schedule. The fine-tuning process used a batch size of 16 and a sequence length of 128 tokens. For each optimizer evaluated (AdamW, Muon, ASGO, and DASGO), all hyperparameters, with the exception of the learning rate, were maintained at the same values used in our GPT-2 pretraining experiments (as detailed in Table 4).

**Hyperparameter Tuning:** For the fine-tuning experiments on WikiText-2, our hyperparameter tuning focused exclusively on identifying the optimal learning rate for each optimizer under both the CLM and FIM objectives. We performed a grid search over a predefined set of learning rate candidates:  $[1 \times 10^{-6}, 5 \times 10^{-5}, 1 \times 10^{-4}, 5 \times 10^{-4}, 1 \times 10^{-3}, 5 \times 10^{-3}]$ . The optimal learning rate for each optimizer and fine-tuning objective combination was determined by selecting the learning rate that yielded the lowest validation perplexity on the WikiText-2 validation set after the full 2 epochs of fine-tuning. Table 5 shows the optimal learning rate.

Table 5: Optimal Learning rate from Finetuning GPT2-Large

|     | AdamW              | Muon               | ASGO               | DASGO              |
|-----|--------------------|--------------------|--------------------|--------------------|
| CLM | $5 \times 10^{-5}$ | $5 \times 10^{-4}$ | $1 \times 10^{-3}$ | $1 \times 10^{-3}$ |
| FIM | $1 \times 10^{-4}$ | $5 \times 10^{-4}$ | $1 \times 10^{-3}$ | $1 \times 10^{-3}$ |

Table 6 presents the average perplexity results obtained after fine-tuning the GPT2-Large (774M) model for 2 epochs on the WikiText-2 dataset. The  $\pm$  indicates the 95% confidence intervals of the mean perplexity value over these 5 runs, starting from different random seeds.

**Damping parameter  $\epsilon$  sensitivity study:** In this section, we discuss the practical differences between ASGO and Muon. Theoretically, as discussed in Section 6, ASGO can be viewed as an adaptive extension of Muon. Specifically, ASGO’s update rule degenerates to that of Muon in the absence of momentum and adaptive scaling (i.e., when  $\beta_1 = 0$  and  $\beta_2 = 0$ ).

Table 6: Finetuning GPT2-Large Perplexity

|     | AdamW              | Muon               | ASGO               | DASGO              |
|-----|--------------------|--------------------|--------------------|--------------------|
| CLM | $14.010 \pm 0.016$ | $13.912 \pm 0.003$ | $13.879 \pm 0.010$ | $13.841 \pm 0.019$ |
| FIM | $17.458 \pm 2.254$ | $15.933 \pm 0.102$ | $15.661 \pm 0.097$ | $15.451 \pm 0.072$ |

Moreover, if we modify the formulas for  $V_t$  and  $W_{t+1}$  in ASGO (Algorithm 2) to:

$$\begin{aligned}
&\text{if } m < n \text{ then } V_t = \beta_2 V_{t-1} + (1 - \beta_2) M_t M_t^\top \\
&\text{else } V_t = \beta_2 V_{t-1} + (1 - \beta_2) M_t^\top M_t \\
&\text{if } m < n \text{ then } W_{t+1} = W_t - \eta_t (V_t + \epsilon I)^{-\frac{1}{2}} M_t \\
&\text{else } W_{t+1} = W_t - \eta_t M_t (V_t + \epsilon I)^{-\frac{1}{2}}
\end{aligned} \tag{4}$$

and set  $\beta_2 = 0$  ASGO becomes identical to Muon, even with momentum. However, in practical training implementations, a subtle yet crucial difference exists between ASGO and Muon. This distinction arises because ASGO applies an additional preconditioner with  $\epsilon$  damping to the momentum term, a step not present in the standard Muon update.

To precisely study these differences, we set up an experiment using the Muon optimizer as the background optimizer to train a GPT2-model on the NanoGPT dataset for 1000 steps. At each step, we computed and compared the Muon and ASGO update directions  $\Delta W$  in the embedding, query, key, value, and MLP layers. Specifically, we computed:

- **Standard Muon Update Direction (SVD-based):**  $\Delta W_{\text{SVD}}^{\text{Muon}} = U_M V_M^T$ , where  $U_M$  and  $V_M$  are the left and right singular vectors obtained from the first-order momentum  $M$ .
- **Modified ASGO Update Direction (SVD-based,  $\epsilon = 0$ ):**  $\Delta W_{\text{SVD}, \epsilon=0}^{\text{ASGO}} = V_t^{-\frac{1}{2}} M_t$ , where  $V_t^{-\frac{1}{2}}$  is computed via standard Singular Value Decomposition (SVD).
- **Modified ASGO Update Direction (SVD-based,  $\epsilon = 10^{-8}$ ):**  $\Delta W_{\text{SVD}, \epsilon=10^{-8}}^{\text{ASGO}} = (V_t + 10^{-8} I)^{-\frac{1}{2}} M_t$ , where  $(V_t + 10^{-8} I)^{-\frac{1}{2}}$  is computed via standard SVD.
- **Modified ASGO Update Direction (Coupled Newton,  $\epsilon = 10^{-8}$ ):**  $\Delta W_{\text{CN}, \epsilon=10^{-8}}^{\text{ASGO}} = (V_t + 10^{-8} I)^{-\frac{1}{2}} M_t$ , where  $(V_t + 10^{-8} I)^{-\frac{1}{2}}$  is computed using the Coupled Newton algorithm for 50 iteration steps. Higham [2008], Shi et al. [2023]
- **Modified ASGO Update Direction (Newton-Schulz,  $\epsilon = 10^{-8}$ ):**  $\Delta W_{\text{NS}, \epsilon=10^{-8}}^{\text{ASGO}} = (V_t + 10^{-8} I)^{-\frac{1}{2}} M_t$ , where  $(V_t + 10^{-8} I)^{-\frac{1}{2}}$  is computed using the Newton-Schulz algorithm for 50 iteration steps.<sup>5</sup> Higham [2008], Bernstein and Newhouse [2024b], Jordan et al. [2024]

We then computed the cosine similarity<sup>6</sup> between each of the four modified ASGO update directions and the standard Muon update direction  $\Delta W_{\text{SVD}}^{\text{Muon}}$ , and plotted these similarities in Figure 7.

Unlike AdamW, ASGO exhibits sensitivity to the choice of the  $\epsilon$  damping parameter. As depicted in Figure 7(a), when no damping term is used ( $\epsilon = 0$ ), ASGO’s update direction, though exhibiting some instability, largely reconstructs Muon’s update direction, with cosine similarities generally exceeding 0.8, particularly for the MLP and Embedding layers, as training progresses. However, the introduction of a small damping hyperparameter ( $\epsilon = 10^{-8}$ ) significantly alters these similarities. Figure 7(b) shows that even with precise SVD computation, the similarities for layers like Value and Key only reach approximately 0.7 gradually. This suggests that the small  $\epsilon$  value can introduce and accumulate errors during training, potentially leading to a degradation in optimizer performance, a behavior not typically observed in other common adaptive methods like AdamW. This phenomenon highlights the critical importance of small singular values in the preconditioning process, as applying a damping term can disproportionately affect them, thereby altering the matrix multiplication and

<sup>5</sup>The Newton-Schulz algorithm is derived from Algorithm 6.35 on Page 153 in Higham [2008]. We utilized the quintic version with parameters  $(a, b, c) = (2, -1.5, 0.5)$  as described in Jordan et al. [2024].

<sup>6</sup> $\text{CosineSimilarity}(A, B) = \frac{\text{Tr}(A^T B)}{\|A\|_F \|B\|_F}$

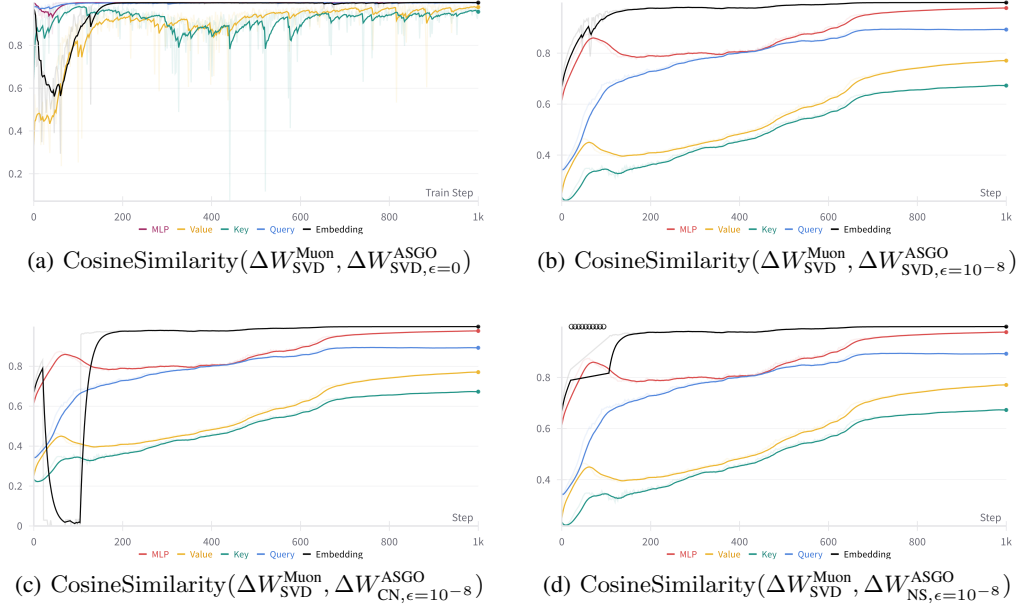

Figure 7: Comparison of Cosine Similarities (CSs) between the Muon update direction ( $\Delta W_{\text{SVD}}^{\text{Muon}}$ ) and various modified ASGO update directions in different layers (MLP, Value, Key, Query, Embedding) during 1000 steps of GPT2 pretraining. Subfigures (a) and (b) plot CSs for SVD-based ASGO update directions with  $\epsilon = 0$  and  $\epsilon = 10^{-8}$ , respectively. Subfigure (c) and (d) plot CSs for Coupled Newton-based and Newton-Schulz-based, respectively, ASGO update directions with  $\epsilon = 10^{-8}$ .

781 amplifying errors. To circumvent this sensitivity, we opted to use an  $\epsilon$  value of 0 in our large-scale  
 782 GPT2 pretraining experiments described in Section 7.2. In this setting, we directly compute the SVD  
 783 of the preconditioning matrix and its inverse square root. The results presented in Figure 2 indeed  
 784 demonstrate that ASGO achieves performance highly similar to Muon.

785 In Figure 7(c) and (d), we explore the use of more computationally efficient methods, Coupled Newton  
 786 (CN) and Newton-Schulz (NS), respectively, to approximately compute  $V_t^{-\frac{1}{2}}$  as alternatives to SVD.  
 787 The results show that, aside from some numerical stability issues observed in the Embedding layer for  
 788 both CN and NS at certain steps—which is reasonable given that the sparse nature of embedding layers  
 789 often requiring larger damping parameters—the cosine similarities for the remaining parameters  
 790 are highly comparable to those obtained with SVD. This demonstrates the feasibility of employing  
 791 efficient matrix algorithms to replace SVD, thereby enhancing ASGO’s computational efficiency.  
 792 This direction represents one of our promising avenues for future research.

## 793 D Auxiliary Lemmas for the Proof

794 **Lemma 1** (Trace properties). *For arbitrary matrices  $A \in \mathbb{R}^{m \times n}$ ,  $B \in \mathbb{R}^{n \times m}$ ,  $X, Y \in \mathbb{R}^{m \times m}$ , we*  
 795 *have the following basic properties for the trace:*

- 796 1.  $\text{tr}(X) = \text{tr}(X^\top)$ ;
- 797 2.  $\text{tr}(AB) = \text{tr}(BA)$ ;
- 798 3. if  $X$  is symmetric positive semidefinite,  $\text{tr}(X) = \|X\|_* \geq 0$ ;
- 799 4. if  $X, Y \succeq 0$  and  $X$  is symmetric,  $\text{tr}(XY) \geq 0$ .

800 The following lemma notes the operator monotonicity of the power functions, which is a classic  
 801 result [Löwner, 1934, Ando et al., 2004, Gupta et al., 2018].

802 **Lemma 2.** *The function  $f : x \rightarrow x^\alpha$  with  $\alpha \in [0, 1]$  is operator-monotone, i.e. if  $0 \preceq A \preceq B$ , it*  
 803 *holds that  $A^\alpha \preceq B^\alpha$ .*

804 **Lemma 3.** For symmetric positive definite matrices  $X, Y \in \mathbb{R}^{m \times m}$ , it holds that

$$\text{tr} \left( (X + Y)^{\frac{1}{2}} \right) \leq \text{tr} \left( X^{\frac{1}{2}} + Y^{\frac{1}{2}} \right).$$

805 *Proof.* It holds that

$$\begin{aligned} \text{tr} \left( (X + Y)^{\frac{1}{2}} \right) &= \text{tr} \left( (X + Y)^{-\frac{1}{2}} (X + Y) \right) \\ &= \text{tr} \left( (X + Y)^{-\frac{1}{2}} X \right) + \text{tr} \left( (X + Y)^{-\frac{1}{2}} Y \right) \\ &\geq \text{tr} \left( X^{\frac{1}{2}} \right) + \text{tr} \left( Y^{\frac{1}{2}} \right), \end{aligned}$$

806 where the last inequality is based on Lemma 2 such that  $(X + Y)^{\frac{1}{2}} \succeq X^{\frac{1}{2}}$  and the fact that  
807  $A^{-1} \preceq B^{-1}$  if  $A \succeq B$  for symmetric positive definite matrices  $A, B$ . Further based on Lemma 1,  
808 we can finish the proof.  $\square$

809 **Lemma 4.** For a symmetric positive semidefinite matrix  $X \in \mathbb{R}^{m \times m}$ , it holds that

$$\text{tr} \left( X^{\frac{1}{2}} \right) \leq \sum_{j=1}^m \sqrt{[X]_{j,j}}.$$

810 *Proof.* The inequality is equivalent to that

$$\sum_{i=1}^m \sqrt{\lambda_i(X)} \leq \sum_{i=1}^m \sqrt{[X]_{i,i}},$$

811 where  $\lambda_i(X)$  denotes the  $i$ -th largest eigenvalue of  $X$  (the same as singular values for real symmetric  
812 positive semidefinite matrices). Firstly, we have the fact that the eigenvalues  $\{\lambda_i(X)\}_{i=1}^m$  majorize  
813 the diagonal entries  $\{[X]_{i,i}\}_{i=1}^m$ , i.e. for all  $1 \leq l < m$ ,

$$\sum_{i=1}^l \lambda_i(X) \geq \sum_{i=1}^l [X]_{i,i}, \quad \text{and} \quad \sum_{i=1}^m \lambda_i(X) = \sum_{i=1}^m [X]_{i,i}.$$

814 Also, we know  $g : \{x_i\}_{i=1}^m \rightarrow \sum_{i=1}^m x_i^{\frac{1}{2}}$  is a Schur-concave operator. Then we obtain the equality  
815 based on the Schur-Horn theorem, which implies that for a Schur-concave operator  $g$ , if sequence  
816  $\{x_i\}_{i=1}^m$  majorizes  $\{y_i\}_{i=1}^m$ , then  $g(\{x_i\}_{i=1}^m) \leq g(\{y_i\}_{i=1}^m)$ .  $\square$

817 **Lemma 5.**  $\|\cdot\|_L$  is a norm, i.e., it satisfies the basic properties of norms. Its dual norm is  $\|\cdot\|_{L^{-1}}$ .

818 *Proof.* Denote  $X = [x_1, \dots, x_n] \in \mathbb{R}^{m \times n}$ , where each  $x_i \in \mathbb{R}^{1 \times m}$ . Then we have

$$\text{tr} (X^\top L X) = \sum_{i=1}^n x_i^\top L x_i = \begin{bmatrix} x_1 \\ \vdots \\ x_n \end{bmatrix}^\top \begin{bmatrix} L & & \\ & L & \\ & & \ddots \\ & & & L \end{bmatrix} \begin{bmatrix} x_1 \\ \vdots \\ x_n \end{bmatrix},$$

819 which is a norm for the space  $\mathbb{R}^{m \times n}$  whose dual norm is  $\|\cdot\|_{L^{-1}}$ . This concludes the proof.  $\square$

820 **Lemma 6.** Assume a non-negative sequence  $\{x_j\}_{j=1}^n$  and a positive sequence  $\{s_j\}_{j=1}^n$  with  $S =$   
821  $\sum_{j=1}^n s_j$ , it holds that

$$\frac{1}{S} \sum_{j=1}^n x_j \leq \sqrt{\frac{1}{S} \sum_{j=1}^n \frac{x_j^2}{s_j}}. \quad (5)$$

The inequality holds as an equality if and only if for all  $i = 1, \dots, n$  and  $j = 1, \dots, n$ ,

$$\frac{x_i}{s_i} = \frac{x_j}{s_j}.$$

822 *Proof.* A proof can be found in Lemma G.5 of the ICLR version of Liu et al. [2024].  $\square$

## E Proof of Nonsmooth Convergence of ASGO

*Proof of Theorem 1.* Denote  $\Delta W_t \triangleq W_t - W_*$  where  $W_*$  is an optimum of Problem (1). From the algorithm update, we have

$$\Delta W_{t+1}^\top \Lambda_t \Delta W_{t+1} = \Delta W_t^\top \Lambda_t \Delta W_t - \eta_t (G_t^\top \Delta W_t + \Delta W_t^\top G_t) + \eta_t^2 G_t^\top \Lambda_t^{-1} G_t.$$

Then, by taking trace of the above equality and rearranging, we can obtain that

$$2\eta_t \text{tr}(G_t^\top \Delta W_t) = \text{tr}(\Delta W_t^\top \Lambda_t \Delta W_t - \Delta W_{t+1}^\top \Lambda_t \Delta W_{t+1}) + \eta_t^2 \text{tr}(G_t^\top \Lambda_t^{-1} G_t).$$

By convexity, we know

$$\mathbb{E}[\text{tr}(G_t^\top \Delta W_t)] = \mathbb{E}[\langle \nabla f(W_t), \Delta W_t \rangle] \geq \mathbb{E}[f(W_t)] - f(W_*).$$

Then combining these and taking summation over  $t$  and taking  $\eta_t \equiv \eta$ , we have

$$\begin{aligned} & 2 \sum_{t=0}^{T-1} \mathbb{E}[f(W_t)] - f(W_*) \\ & \leq \frac{1}{\eta} \mathbb{E} \left[ \sum_{t=0}^{T-1} \text{tr}(\Delta W_t^\top \Lambda_t \Delta W_t - \Delta W_{t+1}^\top \Lambda_t \Delta W_{t+1}) \right] + \eta \mathbb{E} \left[ \sum_{t=0}^{T-1} \text{tr}(G_t^\top \Lambda_t^{-1} G_t) \right] \\ & = \frac{1}{\eta} \mathbb{E} \left[ \sum_{t=0}^{T-1} \text{tr}(\Delta W_t^\top \Lambda_t \Delta W_t - \Delta W_t^\top \Lambda_{t-1} \Delta W_t) \right] + \frac{1}{\eta} \text{tr}(\Delta W_0^\top \Lambda_{-1} \Delta W_0) - \frac{1}{\eta} \mathbb{E}[\text{tr}(\Delta W_T^\top \Lambda_{T-1} \Delta W_T)] \\ & \quad + \eta \mathbb{E} \left[ \sum_{t=0}^{T-1} \text{tr}(G_t^\top \Lambda_t^{-1} G_t) \right] \\ & \leq \frac{1}{\eta} \text{tr}(\Delta W_0^\top \Lambda_{-1} \Delta W_0) + \frac{1}{\eta} \mathbb{E} \left[ \sum_{t=0}^{T-1} \text{tr}(\Delta W_t^\top (\Lambda_t - \Lambda_{t-1}) \Delta W_t) \right] + \eta \mathbb{E} \left[ \sum_{t=0}^{T-1} \text{tr}(G_t^\top \Lambda_t^{-1} G_t) \right], \end{aligned} \tag{6}$$

where we note  $\Lambda_{-1} = \epsilon I_m$ . Thus the first term on the RHS of (6) can be bounded by  $\epsilon$  as

$$\frac{1}{\eta} \text{tr}(\Delta W_0^\top \Lambda_{-1} \Delta W_0) = \frac{\epsilon}{\eta} \|\Delta W_0\|_F^2 \leq \frac{\epsilon D_F^2}{\eta}. \tag{7}$$

We then deal with the second and third terms separately. For the second term, we have

$$\begin{aligned} \sum_{t=0}^{T-1} \text{tr}(\Delta W_t^\top (\Lambda_t - \Lambda_{t-1}) \Delta W_t) &= \sum_{t=0}^{T-1} \text{tr}(\Delta W_t \Delta W_t^\top (\Lambda_t - \Lambda_{t-1})) \\ &= \sum_{t=0}^{T-1} \langle \Delta W_t \Delta W_t^\top, \Lambda_t - \Lambda_{t-1} \rangle \\ &\leq \sum_{t=0}^{T-1} \|\Delta W_t \Delta W_t^\top\|_{\text{op}} \|\Lambda_t - \Lambda_{t-1}\|_* \\ &= \sum_{t=0}^{T-1} \|\Delta W_t\|_{\text{op}}^2 \text{tr}(\Lambda_t - \Lambda_{t-1}) \leq D_{\text{op}}^2 \text{tr}(\Lambda_{T-1} - \text{tr}(\Lambda_{-1})). \end{aligned} \tag{8}$$

Note that the first and last equalities are based on the properties of the trace, (see Lemma 1). The first inequality is based on the duality of the  $\|\cdot\|_{\text{op}}$  and  $\|\cdot\|_*$  norms. The third equality relies on the positive semidefiniteness of  $\Lambda_t - \Lambda_{t-1}$  for all  $t$  based on Lemma 2, since  $\Lambda_t^2 - \Lambda_{t-1}^2 = G_t G_t^\top \succeq 0$ .

For the third term of (6), we have

$$\begin{aligned} \text{tr}(G_t^\top \Lambda_t^{-1} G_t) &= \text{tr}(G_t G_t^\top \Lambda_t^{-1}) = \text{tr}((\Lambda_t^2 - \Lambda_{t-1}^2) \Lambda_t^{-1}) \\ &= \text{tr}(((\Lambda_t - \Lambda_{t-1}) \cdot 2\Lambda_t - (\Lambda_t - \Lambda_{t-1})^2 + \Lambda_{t-1} \Lambda_t - \Lambda_t \Lambda_{t-1}) \Lambda_t^{-1}) \\ &= 2\text{tr}(\Lambda_t - \Lambda_{t-1}) - \text{tr}((\Lambda_t - \Lambda_{t-1})^2 \Lambda_t^{-1}) + \text{tr}((\Lambda_{t-1} \Lambda_t - \Lambda_t \Lambda_{t-1}) \Lambda_t^{-1}) \\ &\leq 2\text{tr}(\Lambda_t - \Lambda_{t-1}), \end{aligned} \tag{9}$$

835 where the last inequality follows from the fact that

$$\text{tr}((\Lambda_t - \Lambda_{t-1})^2 \Lambda_t^{-1}) = \text{tr}\left(\left[(\Lambda_t - \Lambda_{t-1})\Lambda_t^{-\frac{1}{2}}\right]\left[(\Lambda_t - \Lambda_{t-1})\Lambda_t^{-\frac{1}{2}}\right]^\top\right) \geq 0$$

836 and

$$\text{tr}((\Lambda_{t-1}\Lambda_t - \Lambda_t\Lambda_{t-1})\Lambda_t^{-1}) = \text{tr}(\Lambda_{t-1}) - \text{tr}(\Lambda_t\Lambda_{t-1}\Lambda_t^{-1}) = 0,$$

837 which are based on the positive definiteness of  $\Lambda_t$  and the properties of the trace (Lemma 1). Therefore,  
838 by substituting (7), (8), and (9) into (6), we have

$$\begin{aligned} & 2 \sum_{t=0}^{T-1} \mathbb{E}[f(W_t)] - f(W_*) \\ & \leq \frac{1}{\eta} \text{tr}(\Delta W_0^\top \Lambda_{-1} \Delta W_0) + \frac{1}{\eta} \mathbb{E} \left[ \sum_{t=0}^{T-1} \text{tr}(\Delta W_t^\top (\Lambda_t - \Lambda_{t-1}) \Delta W_t) \right] + \eta \mathbb{E} \left[ \sum_{t=0}^{T-1} \text{tr}(G_t^\top \Lambda_t^{-1} G_t) \right] \\ & \leq \frac{\epsilon D_F^2}{\eta} + \left( \frac{D_{\text{op}}^2}{\eta} + 2\eta \right) \mathbb{E}[\text{tr}(\Lambda_{T-1} - \Lambda_{-1})] \\ & = \left( \frac{D_{\text{op}}^2}{\eta} + 2\eta \right) \mathbb{E} \left[ \text{tr} \left( \left( \sum_{t=0}^{T-1} G_t G_t^\top \right)^{\frac{1}{2}} \right) \right] + \frac{\epsilon D_F^2}{\eta}. \end{aligned}$$

839 Taking  $\eta = D_{\text{op}}$  completes the proof.  $\square$

840 Based on Theorem 1 and Lemma 8, we can also prove Corollary 2.

841 *Proof of Corollary 2.* Based on the results in Theorem 1, if we additionally have

$$\mathbb{E}[G_t G_t^\top] \preceq Q^2,$$

842 then using Lemma 8, we can obtain that

$$\begin{aligned} \mathbb{E} \left[ \left\| \left( \sum_{t=0}^{T-1} G_t G_t^\top \right)^{\frac{1}{2}} \right\|_* \right] & \stackrel{(10)}{\leq} \mathbb{E} \left[ \sqrt{\|Q\|_* \text{tr} \left( \left( \sum_{t=0}^{T-1} G_t G_t^\top \right)^{\frac{1}{2}} Q^{-1} \left( \sum_{t=0}^{T-1} G_t G_t^\top \right)^{\frac{1}{2}} \right)} \right] \\ & = \mathbb{E} \left[ \sqrt{\|Q\|_* \text{tr} \left( \sum_{t=0}^{T-1} G_t G_t^\top Q^{-1} \right)} \right] \\ & \leq \sqrt{\|Q\|_* \sum_{t=0}^{T-1} \text{tr}(\mathbb{E}[G_t G_t^\top] Q^{-1})} \\ & \leq \sqrt{\|Q\|_* \sum_{t=0}^{T-1} \|Q\|_*} = \sqrt{T} \|Q\|_*, \end{aligned}$$

843 where the first equality is based on Lemma 1 and the second inequality is based on the fact that  
844  $g(x) = \sqrt{x}$  is concave for  $x \geq 0$ . This concludes the proof.  $\square$

845 We also provide the following proof for the comparison between Theorem 1 and the convergence  
846 rates of Shampoo and full-matrix AdaGrad.

847 *Proof of Comparison with Shampoo and full-matrix AdaGrad.* We list the convergence rates here.

$$\text{Full-Matrix AdaGrad: } \mathcal{O} \left( D_F \sum_{j=1}^m \sum_{i=1}^n \sqrt{\sum_{t=0}^{T-1} [G_t]_{i,j}^2} \right)$$



$$\begin{aligned} \text{Shampoo: } & \mathcal{O} \left( \sqrt{r_G} D_F \cdot \text{tr} \left( \left( \sum_{t=0}^{T-1} G_t G_t^\top \right)^{\frac{1}{4}} \right) \cdot \text{tr} \left( \left( \sum_{t=0}^{T-1} G_t^\top G_t \right)^{\frac{1}{4}} \right) \right) \\ \text{ASGO: } & \mathcal{O} \left( D_{\text{op}} \cdot \text{tr} \left( \left( \sum_{t=0}^{T-1} G_t G_t^\top \right)^{\frac{1}{2}} \right) \right) \leq \mathcal{O} \left( D_{\text{op}} \cdot \sum_{j=1}^m \sqrt{\sum_{i=1}^n \sum_{t=0}^{T-1} [G_t]_{i,j}^2} \right). \end{aligned}$$

848 The last inequality for ASGO is based on Lemma 4. We first compare ASGO and full-matrix  
849 AdaGrad:

$$\text{tr} \left( \left( \sum_{t=0}^{T-1} G_t G_t^\top \right)^{\frac{1}{2}} \right) \leq \sum_{j=1}^m \sqrt{\left[ \sum_{t=0}^{T-1} G_t G_t^\top \right]_{j,j}} = \sum_{j=1}^m \sqrt{\sum_{i=1}^n \sum_{t=0}^{T-1} [G_t]_{i,j}^2} \leq \sum_{j=1}^m \sum_{i=1}^n \sqrt{\sum_{t=0}^{T-1} [G_t]_{i,j}^2},$$

850 where the first inequality is based on Lemma 4 and the second inequality is simply a fact that for any  
851 vector  $x$ , we have  $\|x\|_2 \geq \|x\|_1$ . Thus we prove that the proven convergence rate of ASGO is at least  
852  $D_F/D_{\text{op}}$  times faster than full-matrix AdaGrad.

853 Then we compare ASGO and Shampoo. We have

$$\begin{aligned} \text{tr} \left( \left( \sum_{t=0}^{T-1} G_t G_t^\top \right)^{\frac{1}{2}} \right) &= \left\langle \left( \sum_{t=0}^{T-1} G_t G_t^\top \right)^{\frac{1}{4}}, \left( \sum_{t=0}^{T-1} G_t G_t^\top \right)^{\frac{1}{4}} \right\rangle \\ &\leq \text{tr} \left( \left( \sum_{t=0}^{T-1} G_t G_t^\top \right)^{\frac{1}{4}} \right) \cdot \left\| \left( \sum_{t=0}^{T-1} G_t G_t^\top \right)^{\frac{1}{4}} \right\|_{\text{op}} \\ &= \text{tr} \left( \left( \sum_{t=0}^{T-1} G_t G_t^\top \right)^{\frac{1}{4}} \right) \cdot \left\| \sum_{t=0}^{T-1} G_t G_t^\top \right\|_{\text{op}}^{\frac{1}{4}}, \end{aligned}$$

854 where the inequality is based on the fact that  $\|\cdot\|_{\text{op}}$  and  $\|\cdot\|_*$  are dual norms. Then we have

$$\begin{aligned} \left\| \sum_{t=0}^{T-1} G_t G_t^\top \right\|_{\text{op}}^{\frac{1}{4}} &\leq \left( \sum_{t=0}^{T-1} \|G_t G_t^\top\|_{\text{op}} \right)^{\frac{1}{4}} = \left( \sum_{t=0}^{T-1} \|G_t^\top G_t\|_{\text{op}} \right)^{\frac{1}{4}} \\ &\leq \left( \text{tr} \left( \sum_{t=0}^{T-1} G_t^\top G_t \right) \right)^{\frac{1}{4}} \leq \text{tr} \left( \left( \sum_{t=0}^{T-1} G_t^\top G_t \right)^{\frac{1}{4}} \right), \end{aligned}$$

855 where the first inequality is based on that  $\|\cdot\|_{\text{op}}$  is a norm and the second inequality is based on the  
856 fact that  $\text{tr}(X) \geq \|X\|_{\text{op}}$  for symmetric positive semidefinite  $X$ , and the third inequality is based on  
857 the fact that  $(\text{tr}(X))^{\frac{1}{4}} \leq \text{tr}(X^{\frac{1}{4}})$  because if we denote  $\sigma_j$  as the  $j$ -th singular value of  $X$ , we have

$$(\text{tr}(X))^{\frac{1}{4}} = \left( \sum_{j=1}^r \sigma_j \right)^{\frac{1}{4}} \leq \sum_{j=1}^r \sigma_j^{\frac{1}{4}}.$$

858 Thus we can conclude that

$$\text{tr} \left( \left( \sum_{t=0}^{T-1} G_t G_t^\top \right)^{\frac{1}{2}} \right) \leq \text{tr} \left( \left( \sum_{t=0}^{T-1} G_t G_t^\top \right)^{\frac{1}{4}} \right) \cdot \text{tr} \left( \left( \sum_{t=0}^{T-1} G_t^\top G_t \right)^{\frac{1}{4}} \right).$$

859 Therefore, the proven rate of ASGO is at least  $\sqrt{r_G} D_F/D_{\text{op}}$  times faster than Shampoo.  $\square$

## 860 F Proof of Smooth Convergence of ASGO

861 The starting point of the smooth analysis is Theorem 1. For notation simplicity, we denote  $N_t \triangleq$   
 862  $G_t - \nabla f(W_t)$  and  $\nabla f_t \triangleq \nabla f(W_t)$  in this section.

863 **Lemma 7** (Separate Gradient and Noise). *Under the same settings as Theorem 1, it holds that*

$$\frac{1}{T} \sum_{t=0}^{T-1} \mathbb{E}[f(W_t) - f(W_*)] \leq \frac{D_{\text{op}}}{T} \mathbb{E} \left[ \left\| \left( 2 \sum_{t=0}^{T-1} \nabla f_t \nabla f_t^\top \right)^{\frac{1}{2}} \right\|_* \right] + \frac{D_{\text{op}}}{T} \mathbb{E} \left[ \left\| \left( 2 \sum_{t=0}^{T-1} N_t N_t^\top \right)^{\frac{1}{2}} \right\|_* \right] + \frac{\epsilon D_{\text{F}}^2}{D_{\text{op}} T}.$$

864 *Proof.* Based on Theorem 1, we have

$$\begin{aligned} \frac{1}{T} \sum_{t=0}^{T-1} \mathbb{E}[f(W_t) - f(W_*)] &\leq \frac{D_{\text{op}}}{T} \mathbb{E} \left[ \left\| \left( \sum_{t=0}^{T-1} G_t G_t^\top \right)^{\frac{1}{2}} \right\|_* \right] + \frac{\epsilon D_{\text{F}}^2}{D_{\text{op}} T} \\ &\leq \frac{D_{\text{op}}}{T} \mathbb{E} \left[ \left\| \left( \sum_{t=0}^{T-1} 2 \nabla f_t \nabla f_t^\top + 2 N_t N_t^\top \right)^{\frac{1}{2}} \right\|_* \right] + \frac{\epsilon D_{\text{F}}^2}{D_{\text{op}} T} \\ &\leq \frac{D_{\text{op}}}{T} \mathbb{E} \left[ \left\| \left( 2 \sum_{t=0}^{T-1} \nabla f_t \nabla f_t^\top \right)^{\frac{1}{2}} \right\|_* \right] + \frac{D_{\text{op}}}{T} \mathbb{E} \left[ \left\| \left( 2 \sum_{t=0}^{T-1} N_t N_t^\top \right)^{\frac{1}{2}} \right\|_* \right] + \frac{\epsilon D_{\text{F}}^2}{D_{\text{op}} T}. \end{aligned}$$

865 Here the first inequality comes directly from Theorem 1. The second inequality is based on the fact  
 866 that for all  $A, B \in \mathbb{R}^{m \times n}$  we have

$$\begin{aligned} 2AA^\top + 2BB^\top - (A+B)(A+B)^\top &= AA^\top + BB^\top - A^\top B - B^\top A \\ &= (A-B)(A-B)^\top \succeq 0. \end{aligned}$$

867 The last inequality is based on Lemma 3. □

868 The following lemma is a key technical lemma for proving the smooth convergence results, which is  
 869 a generalization to the matrix case of Lemma 6.

870 **Lemma 8** (An upper bound on  $\|\cdot\|_*$ ). *For a symmetric positive definite matrix  $\Lambda \in \mathbb{R}^{m \times m}$  and*  
 871 *matrix  $G \in \mathbb{R}^{m \times n}$ , it holds that*

$$\|G\|_* \leq \sqrt{\|\Lambda\|_* \text{tr}(G^\top \Lambda^{-1} G)}. \quad (10)$$

872 *Proof.* We first consider the case  $\Lambda = \text{diag}[\lambda_1, \dots, \lambda_m]$  is a diagonal matrix. We have

$$\begin{aligned} \|G\|_* &= \text{tr} \left( (GG^\top)^{\frac{1}{2}} \right) \leq \sum_{j=1}^m \sqrt{[GG^\top]_{j,j}} \\ &\leq \sqrt{\left( \sum_{j=1}^m \lambda_j \right) \left( \sum_{j=1}^m \frac{[GG^\top]_{j,j}}{\lambda_j} \right)} \\ &= \sqrt{\|\Lambda\|_* \text{tr}(GG^\top \Lambda^{-1})} = \sqrt{\|\Lambda\|_* \text{tr}(G^\top \Lambda^{-1} G)}, \end{aligned}$$

873 where the first inequality is based on Lemma 4 and the second inequality is based on Lemma 6.

874 Then we prove that this holds for general symmetric positive definite matrix  $\Lambda$ . Let the singular value  
 875 decomposition be  $\Lambda = U \Sigma U^\top$ . Denote  $\tilde{G} = U^\top G$ . Since  $\Sigma \in \mathbb{R}^{m \times m}$  is a diagonal matrix, it holds  
 876 that

$$\begin{aligned} \|G\|_* &= \|\tilde{G}\|_* \leq \sqrt{\|\Sigma\|_* \text{tr}(\tilde{G}^\top \Sigma^{-1} \tilde{G})} = \sqrt{\|\Lambda\|_* \text{tr}(G^\top U \Sigma^{-1} U^\top G)} \\ &= \sqrt{\|\Lambda\|_* \text{tr}(G^\top \Lambda^{-1} G)}, \end{aligned}$$

877 which concludes the proof. □

878 We also use the following lemma to indicate the reduction of variance by batch size  $M$ .

879 **Lemma 9** (Variance reduction by batch size). *Under Assumption 3, we have*

$$\mathbb{E} [N_t N_t^\top] \preceq \frac{1}{M} V^2,$$

880 where we denote  $N_t \triangleq G_t - \nabla f(W_t)$  for Algorithm 1.

881 *Proof.* For notation simplicity, we denote  $N(W_t; \xi) \triangleq \nabla f(W_t; \xi) - \nabla f(W_t)$  and thus

$$N_t = \frac{1}{M} \sum_{\xi \in \mathcal{B}} N(W_t; \xi).$$

882 Then it holds that

$$\begin{aligned} \mathbb{E} [N_t N_t^\top] &= \frac{1}{M^2} \mathbb{E} \left[ \left( \sum_{\xi \in \mathcal{B}} N(W_t; \xi) \right) \left( \sum_{\zeta \in \mathcal{B}} N(W_t; \zeta) \right)^\top \right] \\ &= \frac{1}{M^2} \sum_{\xi \in \mathcal{B}} \sum_{\zeta \in \mathcal{B}} \mathbb{E} [N(W_t; \xi) N(W_t; \zeta)^\top] \\ &= \frac{1}{M^2} \sum_{\xi \in \mathcal{B}} \mathbb{E} [N(W_t; \xi) N(W_t; \xi)^\top] \\ &\preceq \frac{1}{M^2} \sum_{\xi \in \mathcal{B}} V^2 = \frac{1}{M} V^2, \end{aligned}$$

883 where the last equality is based on that  $\nabla f(W_t; \xi)$  are mutually independent and  $\mathbb{E}[N(W_t; \xi)] = 0$   
884 and the last inequality is based on Assumption 3.  $\square$

885 Then based on these lemmas, we can prove the smooth results.

886 *Proof of Theorem 3.* We separately deal with the bias and variance terms, which refer to the first  
887 two terms on the RHS of Lemma 7. For the bias part, by plugging in the smoothness matrix  $L$  into  
888 Lemma 8, we can obtain

$$\begin{aligned} \mathbb{E} \left[ \left\| \left( \sum_{t=0}^{T-1} \nabla f_t \nabla f_t^\top \right)^{\frac{1}{2}} \right\|_* \right] &\stackrel{(10)}{\leq} \mathbb{E} \left[ \sqrt{\|L\|_* \operatorname{tr} \left( \left( \sum_{t=0}^{T-1} \nabla f_t \nabla f_t^\top \right)^{\frac{1}{2}} L^{-1} \left( \sum_{t=0}^{T-1} \nabla f_t \nabla f_t^\top \right)^{\frac{1}{2}} \right)} \right] \\ &= \mathbb{E} \left[ \sqrt{\|L\|_* \operatorname{tr} \left( \sum_{t=0}^{T-1} \nabla f_t \nabla f_t^\top L^{-1} \right)} \right] \\ &\leq \sqrt{\|L\|_* \sum_{t=0}^{T-1} \mathbb{E} [\|\nabla f_t\|_{L^{-1}}^2]} \leq \sqrt{\|L\|_* \sum_{t=0}^{T-1} 2(f(W_t) - f(W_*))}, \end{aligned}$$

889 where the equalities are based on Lemma 1 and the second inequality is based on the fact that  $g(x) =$   
890  $\sqrt{x}$  is concave for  $x \geq 0$ . The last inequality is based on the properties of smoothness [Nesterov  
891 et al., 2018] and the fact that  $\|\cdot\|_{L^{-1}}$  is the dual norm of  $\|\cdot\|_L$ .

892 Then, for the variance part, let us first assume  $M = 1$  for simplicity, then we have

$$\begin{aligned} \mathbb{E} \left[ \left\| \left( \sum_{t=0}^{T-1} N_t N_t^\top \right)^{\frac{1}{2}} \right\|_* \right] &\stackrel{(10)}{\leq} \mathbb{E} \left[ \sqrt{\|V\|_* \operatorname{tr} \left( \left( \sum_{t=0}^{T-1} N_t N_t^\top \right)^{\frac{1}{2}} V^{-1} \left( \sum_{t=0}^{T-1} N_t N_t^\top \right)^{\frac{1}{2}} \right)} \right] \\ &= \mathbb{E} \left[ \sqrt{\|V\|_* \operatorname{tr} \left( \sum_{t=0}^{T-1} N_t N_t^\top V^{-1} \right)} \right] \end{aligned}$$

$$\begin{aligned} &\leq \sqrt{\|V\|_* \sum_{t=0}^{T-1} \text{tr}(\mathbb{E}[N_t N_t^\top] V^{-1})} \\ &\leq \sqrt{\|V\|_* \sum_{t=0}^{T-1} \|V\|_*} = \sqrt{T} \|V\|_*, \end{aligned}$$

where the equality is based on Lemma 1. and the second inequality is based on the fact that  $g(x) = \sqrt{x}$  is concave for  $x \geq 0$ . Then plugging these in Lemma 7, we have

$$\begin{aligned} \frac{1}{T} \sum_{t=0}^{T-1} \mathbb{E}[f(W_t) - f(W_*)] &\leq \frac{D_{\text{op}}}{T} \mathbb{E} \left[ \left\| \left( 2 \sum_{t=0}^{T-1} \nabla f_t \nabla f_t^\top \right)^{\frac{1}{2}} \right\|_* \right] + \frac{D_{\text{op}}}{T} \mathbb{E} \left[ \left\| \left( 2 \sum_{t=0}^{T-1} N_t N_t^\top \right)^{\frac{1}{2}} \right\|_* \right] + \frac{\epsilon D_{\text{F}}^2}{D_{\text{op}} T} \\ &\leq \frac{2D_{\text{op}}}{T} \sqrt{\|L\|_* \sum_{t=0}^{T-1} \mathbb{E}[f(W_t) - f(W_*)]} + \frac{\sqrt{2} D_{\text{op}} \|V\|_*}{\sqrt{T}} + \frac{\epsilon D_{\text{F}}^2}{D_{\text{op}} T}. \end{aligned}$$

Thus if we denote  $x = \sqrt{\frac{1}{T} \sum_{t=0}^{T-1} \mathbb{E}[f(W_t) - f(W_*)]}$ , we can write the inequality as

$$x^2 \leq bx + c,$$

where

$$b = \frac{2D_{\text{op}} \sqrt{\|L\|_*}}{\sqrt{T}}, \quad c = \frac{\sqrt{2} D_{\text{op}} \|V\|_*}{\sqrt{T}} + \frac{\epsilon D_{\text{F}}^2}{D_{\text{op}} T}.$$

Then as  $x \geq 0$ , we can solve this simple quadratic inequality to obtain that

$$\begin{aligned} x^2 &\leq \frac{1}{4} (b + \sqrt{b^2 + 4c})^2 \leq 2b^2 + 2c \\ &\iff \frac{1}{T} \sum_{t=0}^{T-1} \mathbb{E}[f(W_t) - f(W_*)] \leq \frac{4D_{\text{op}}^2 \|L\|_*}{T} + \frac{2\sqrt{2} D_{\text{op}} \|V\|_*}{\sqrt{T}} + \frac{2\epsilon D_{\text{F}}^2}{D_{\text{op}} T}, \end{aligned}$$

which concludes the proof for  $M = 1$ . Then, based on Lemma 9 to incorporate batch size  $M > 1$ , we finish the proof.  $\square$

## G Proof of Section 6

Muon [Jordan et al., 2024] is essentially the following algorithm:

$$\begin{aligned} B_t &= \mu B_{t-1} + G_t \\ U_t, S_t, V_t &= \text{Compact SVD}(B_t) \\ W_{t+1} &= W_t - \eta_t U_t V_t^\top, \end{aligned} \tag{11}$$

where  $G_t$  is the gradient obtained at  $W_t$  and  $U_t \in \mathbb{R}^{m \times r_t}$ ,  $V_t \in \mathbb{R}^{r_t \times n}$  are the matrices of the  $r_t$  left and right singular vectors corresponding to the non-zero singular values of  $B_t$  that are the diagonal components of the diagonal matrix  $S_t \in \mathbb{R}^{r_t \times r_t}$  with  $r_t$  being the rank of  $B_t$ . Note that  $U_t S_t V_t^\top$  is referred to as the "compact" or "Reduced" SVD of  $B_t$ . Muon implements this algorithm using Newton-Schulz matrix iterations to approximately compute  $U_t V_t^\top$  instead of directly employing SVD to improve computational efficiency. The relationship between (11), with  $B_t = G_t$ , and (2) is interpreted in Bernstein and Newhouse [2024b] (see Story II). In the following discussion, we refer Muon as the one described in (11). We first show that ASGO and Muon, without gradient accumulation and momentum, are equivalent.

**Proposition 1.** *If in ASGO (Algorithm 2 version) we set  $\beta_1 = \beta_2 = 0$ ,  $\epsilon = 0$ , and  $\tau = 1$ , and in Muon (11) we set  $\mu = 0$ , ASGO is equivalent to Muon.*

*Proof.* Let  $U_t S_t V_t^\top$  be the compact SVD of  $G_t$ . For ASGO, the update is

$$W_{t+1} = W_t - \eta_t (G_t G_t^\top)^{-\frac{1}{2}} G_t$$

$$\begin{aligned}
&= W_t - \eta_t (U_t S_t S_t^\top U_t^\top)^{-\frac{1}{2}} U_t S_t V_t^\top \\
&= W_t - \eta_t U_t (S_t^2)^{-\frac{1}{2}} U_t^\top U_t S_t V_t^\top \\
&= W_t - \eta_t U_t S_t^{-1} S_t V_t^\top \\
&= W_t - \eta_t U_t V_t^\top.
\end{aligned}$$

914 Clearly, this is the same as Muon.  $\square$

915 We now prove a nonconvex convergence result for Muon in the deterministic case with  $\mu = 0$ .

916 **Theorem 4** (Nonconvex convergence of Muon). *We consider Muon presented in (11) with  $\mu = 0$ . In*  
917 *the deterministic case, i.e. no gradient noise, if we assume that there exists a lower bound  $f^*$  such*  
918 *that  $f(W) \geq f^*$  for all  $W$  and Assumption 2, by taking  $\eta_t \equiv \eta = \sqrt{\frac{2(f(W_0) - f^*)}{\|L\|_* T}}$ , it holds that*

$$\frac{1}{T} \sum_{t=0}^{T-1} \|\nabla f(W_t)\|_* \leq \sqrt{\frac{\|L\|_* (f(W_0) - f^*)}{2T}}.$$

919 *Proof.* Since we assume the deterministic setting, we have  $G_t = \nabla f(W_t)$ . Also, since we assume  
920  $\mu = 0$ , we have  $U_t, V_t$  are the left and right singular vectors of  $G_t$  such that  $G_t = U_t S_t V_t^\top$ . Then  
921 based on the smoothness assumption, it holds that

$$\begin{aligned}
f(W_{t+1}) &\leq f(W_t) + \langle \nabla f(W_t), W_{t+1} - W_t \rangle + \frac{1}{2} \text{tr}((W_{t+1} - W_t)^\top L(W_{t+1} - W_t)) \\
&= f(W_t) - \eta_t \text{tr}(G_t^\top U_t V_t^\top) + \frac{\eta_t^2}{2} \text{tr}((U_t V_t^\top)^\top L(U_t V_t^\top)) \\
&= f(W_t) - \eta_t \text{tr}(V_t S_t U_t^\top U_t V_t^\top) + \frac{\eta_t^2}{2} \text{tr}(V_t U_t^\top L U_t V_t^\top) \\
&= f(W_t) - \eta_t \text{tr}(V_t S_t V_t^\top) + \frac{\eta_t^2}{2} \text{tr}(U_t^\top L U_t V_t^\top V_t) \\
&= f(W_t) - \eta_t \text{tr}(S_t V_t^\top V_t) + \frac{\eta_t^2}{2} \text{tr}(L U_t U_t^\top) \\
&\leq f(W_t) - \eta_t \|G_t\|_* + \frac{\eta_t^2}{2} \|L\|_*,
\end{aligned}$$

922 where the last inequality is because of the fact that  $U U^\top \preceq I$  and Lemma 1. Then by summing up  
923 over  $t$  and rearrangement, we can obtain that

$$\sum_{t=0}^{T-1} \eta_t \|G_t\| \leq f(W_0) - f(W_T) + \sum_{t=0}^{T-1} \frac{\eta_t^2}{2} \|L\|_*.$$

924 Then we take  $\eta_t \equiv \eta$  to obtain that

$$\frac{1}{T} \sum_{t=0}^{T-1} \|\nabla f(W_t)\| \leq \frac{f(W_0) - f^*}{\eta T} + \frac{\eta}{2} \|L\|_*.$$

925 Setting  $\eta = \sqrt{\frac{2(f(W_0) - f^*)}{\|L\|_* T}}$  finishes the proof.  $\square$

## NeurIPS Paper Checklist

### 1. Claims

Question: Do the main claims made in the abstract and introduction accurately reflect the paper's contributions and scope?

Answer: [\[Yes\]](#)

Justification: We claim our main contribution both in abstract and summerized in the end of introduction part.

Guidelines:

- The answer NA means that the abstract and introduction do not include the claims made in the paper.
- The abstract and/or introduction should clearly state the claims made, including the contributions made in the paper and important assumptions and limitations. A No or NA answer to this question will not be perceived well by the reviewers.
- The claims made should match theoretical and experimental results, and reflect how much the results can be expected to generalize to other settings.
- It is fine to include aspirational goals as motivation as long as it is clear that these goals are not attained by the paper.

### 2. Limitations

Question: Does the paper discuss the limitations of the work performed by the authors?

Answer: [\[Yes\]](#)

Justification: We discuss the limitations of the proposed algorithm in the conclusion section.

Guidelines:

- The answer NA means that the paper has no limitation while the answer No means that the paper has limitations, but those are not discussed in the paper.
- The authors are encouraged to create a separate "Limitations" section in their paper.
- The paper should point out any strong assumptions and how robust the results are to violations of these assumptions (e.g., independence assumptions, noiseless settings, model well-specification, asymptotic approximations only holding locally). The authors should reflect on how these assumptions might be violated in practice and what the implications would be.
- The authors should reflect on the scope of the claims made, e.g., if the approach was only tested on a few datasets or with a few runs. In general, empirical results often depend on implicit assumptions, which should be articulated.
- The authors should reflect on the factors that influence the performance of the approach. For example, a facial recognition algorithm may perform poorly when image resolution is low or images are taken in low lighting. Or a speech-to-text system might not be used reliably to provide closed captions for online lectures because it fails to handle technical jargon.
- The authors should discuss the computational efficiency of the proposed algorithms and how they scale with dataset size.
- If applicable, the authors should discuss possible limitations of their approach to address problems of privacy and fairness.
- While the authors might fear that complete honesty about limitations might be used by reviewers as grounds for rejection, a worse outcome might be that reviewers discover limitations that aren't acknowledged in the paper. The authors should use their best judgment and recognize that individual actions in favor of transparency play an important role in developing norms that preserve the integrity of the community. Reviewers will be specifically instructed to not penalize honesty concerning limitations.

### 3. Theory assumptions and proofs

Question: For each theoretical result, does the paper provide the full set of assumptions and a complete (and correct) proof?

Answer: [\[Yes\]](#)

Justification: We provide proofs and assumptions for all the theorems.

Guidelines:

- The answer NA means that the paper does not include theoretical results.
- All the theorems, formulas, and proofs in the paper should be numbered and cross-referenced.
- All assumptions should be clearly stated or referenced in the statement of any theorems.
- The proofs can either appear in the main paper or the supplemental material, but if they appear in the supplemental material, the authors are encouraged to provide a short proof sketch to provide intuition.
- Inversely, any informal proof provided in the core of the paper should be complemented by formal proofs provided in appendix or supplemental material.
- Theorems and Lemmas that the proof relies upon should be properly referenced.

#### 4. Experimental result reproducibility

Question: Does the paper fully disclose all the information needed to reproduce the main experimental results of the paper to the extent that it affects the main claims and/or conclusions of the paper (regardless of whether the code and data are provided or not)?

Answer: [Yes]

Justification: We clearly clarify all details including experiment setting and hyperparameter tuning method in Appendix Section C which make the experiments reproducible.

Guidelines:

- The answer NA means that the paper does not include experiments.
- If the paper includes experiments, a No answer to this question will not be perceived well by the reviewers: Making the paper reproducible is important, regardless of whether the code and data are provided or not.
- If the contribution is a dataset and/or model, the authors should describe the steps taken to make their results reproducible or verifiable.
- Depending on the contribution, reproducibility can be accomplished in various ways. For example, if the contribution is a novel architecture, describing the architecture fully might suffice, or if the contribution is a specific model and empirical evaluation, it may be necessary to either make it possible for others to replicate the model with the same dataset, or provide access to the model. In general, releasing code and data is often one good way to accomplish this, but reproducibility can also be provided via detailed instructions for how to replicate the results, access to a hosted model (e.g., in the case of a large language model), releasing of a model checkpoint, or other means that are appropriate to the research performed.
- While NeurIPS does not require releasing code, the conference does require all submissions to provide some reasonable avenue for reproducibility, which may depend on the nature of the contribution. For example
  - (a) If the contribution is primarily a new algorithm, the paper should make it clear how to reproduce that algorithm.
  - (b) If the contribution is primarily a new model architecture, the paper should describe the architecture clearly and fully.
  - (c) If the contribution is a new model (e.g., a large language model), then there should either be a way to access this model for reproducing the results or a way to reproduce the model (e.g., with an open-source dataset or instructions for how to construct the dataset).
  - (d) We recognize that reproducibility may be tricky in some cases, in which case authors are welcome to describe the particular way they provide for reproducibility. In the case of closed-source models, it may be that access to the model is limited in some way (e.g., to registered users), but it should be possible for other researchers to have some path to reproducing or verifying the results.

#### 5. Open access to data and code

Question: Does the paper provide open access to the data and code, with sufficient instructions to faithfully reproduce the main experimental results, as described in supplemental material?

1033 Answer: [Yes]

1034 Justification: We plan to make the code publicly available in a GitHub repository upon  
 1035 publication. All datasets used are publicly available and cited, with setup details in Appendix  
 1036 C.

1037 Guidelines:

- 1038 • The answer NA means that paper does not include experiments requiring code.
- 1039 • Please see the NeurIPS code and data submission guidelines (<https://nips.cc/public/guides/CodeSubmissionPolicy>) for more details.
- 1040 • While we encourage the release of code and data, we understand that this might not be  
 1041 possible, so “No” is an acceptable answer. Papers cannot be rejected simply for not  
 1042 including code, unless this is central to the contribution (e.g., for a new open-source  
 1043 benchmark).
- 1044 • The instructions should contain the exact command and environment needed to run to  
 1045 reproduce the results. See the NeurIPS code and data submission guidelines (<https://nips.cc/public/guides/CodeSubmissionPolicy>) for more details.
- 1046 • The authors should provide instructions on data access and preparation, including how  
 1047 to access the raw data, preprocessed data, intermediate data, and generated data, etc.
- 1048 • The authors should provide scripts to reproduce all experimental results for the new  
 1049 proposed method and baselines. If only a subset of experiments are reproducible, they  
 1050 should state which ones are omitted from the script and why.
- 1051 • At submission time, to preserve anonymity, the authors should release anonymized  
 1052 versions (if applicable).
- 1053 • Providing as much information as possible in supplemental material (appended to the  
 1054 paper) is recommended, but including URLs to data and code is permitted.

1055

1056

1057 **6. Experimental setting/details**

1058 Question: Does the paper specify all the training and test details (e.g., data splits, hyper-  
 1059 parameters, how they were chosen, type of optimizer, etc.) necessary to understand the  
 1060 results?

1061 Answer: [Yes]

1062 Justification: All training and test details, including model setting, hyperparameter selection,  
 1063 and optimizer configurations, are specified in Appendix C.

1064 Guidelines:

- 1065 • The answer NA means that the paper does not include experiments.
- 1066 • The experimental setting should be presented in the core of the paper to a level of detail  
 1067 that is necessary to appreciate the results and make sense of them.
- 1068 • The full details can be provided either with the code, in appendix, or as supplemental  
 1069 material.

1070

1071 **7. Experiment statistical significance**

1072 Question: Does the paper report error bars suitably and correctly defined or other appropriate  
 1073 information about the statistical significance of the experiments?

1074 Answer: [Yes]

1075 Justification: To account for statistical variability, we set the fixed random seed or report  
 1076 mean training performance among difference random seeds to verify our proposed algorithm  
 1077 performance.

1078 Guidelines:

- 1079 • The answer NA means that the paper does not include experiments.
- 1080 • The authors should answer "Yes" if the results are accompanied by error bars, confi-  
 1081 dence intervals, or statistical significance tests, at least for the experiments that support  
 1082 the main claims of the paper.
- 1083 • The factors of variability that the error bars are capturing should be clearly stated (for  
 1084 example, train/test split, initialization, random drawing of some parameter, or overall  
 run with given experimental conditions).



- The method for calculating the error bars should be explained (closed form formula, call to a library function, bootstrap, etc.)
- The assumptions made should be given (e.g., Normally distributed errors).
- It should be clear whether the error bar is the standard deviation or the standard error of the mean.
- It is OK to report 1-sigma error bars, but one should state it. The authors should preferably report a 2-sigma error bar than state that they have a 96% CI, if the hypothesis of Normality of errors is not verified.
- For asymmetric distributions, the authors should be careful not to show in tables or figures symmetric error bars that would yield results that are out of range (e.g. negative error rates).
- If error bars are reported in tables or plots, The authors should explain in the text how they were calculated and reference the corresponding figures or tables in the text.

## 8. Experiments compute resources

Question: For each experiment, does the paper provide sufficient information on the computer resources (type of compute workers, memory, time of execution) needed to reproduce the experiments?

Answer: [Yes]

Justification: We report the computer resources we use in Section 7.

Guidelines:

- The answer NA means that the paper does not include experiments.
- The paper should indicate the type of compute workers CPU or GPU, internal cluster, or cloud provider, including relevant memory and storage.
- The paper should provide the amount of compute required for each of the individual experimental runs as well as estimate the total compute.
- The paper should disclose whether the full research project required more compute than the experiments reported in the paper (e.g., preliminary or failed experiments that didn't make it into the paper).

## 9. Code of ethics

Question: Does the research conducted in the paper conform, in every respect, with the NeurIPS Code of Ethics <https://neurips.cc/public/EthicsGuidelines?>

Answer: [Yes]

Justification: Our research conducted in the paper conform, in every respect, with the NeurIPS Code of Ethics.

Guidelines:

- The answer NA means that the authors have not reviewed the NeurIPS Code of Ethics.
- If the authors answer No, they should explain the special circumstances that require a deviation from the Code of Ethics.
- The authors should make sure to preserve anonymity (e.g., if there is a special consideration due to laws or regulations in their jurisdiction).

## 10. Broader impacts

Question: Does the paper discuss both potential positive societal impacts and negative societal impacts of the work performed?

Answer: [NA]

Justification: This paper proposes a foundational optimization algorithm aimed at improving the training efficiency and effectiveness of deep neural networks. This work does not introduce direct applications or systems with immediate societal consequences beyond the general implications of advancing ML research.

Guidelines:

- The answer NA means that there is no societal impact of the work performed.

- If the authors answer NA or No, they should explain why their work has no societal impact or why the paper does not address societal impact.
- Examples of negative societal impacts include potential malicious or unintended uses (e.g., disinformation, generating fake profiles, surveillance), fairness considerations (e.g., deployment of technologies that could make decisions that unfairly impact specific groups), privacy considerations, and security considerations.
- The conference expects that many papers will be foundational research and not tied to particular applications, let alone deployments. However, if there is a direct path to any negative applications, the authors should point it out. For example, it is legitimate to point out that an improvement in the quality of generative models could be used to generate deepfakes for disinformation. On the other hand, it is not needed to point out that a generic algorithm for optimizing neural networks could enable people to train models that generate Deepfakes faster.
- The authors should consider possible harms that could arise when the technology is being used as intended and functioning correctly, harms that could arise when the technology is being used as intended but gives incorrect results, and harms following from (intentional or unintentional) misuse of the technology.
- If there are negative societal impacts, the authors could also discuss possible mitigation strategies (e.g., gated release of models, providing defenses in addition to attacks, mechanisms for monitoring misuse, mechanisms to monitor how a system learns from feedback over time, improving the efficiency and accessibility of ML).

## 11. Safeguards

Question: Does the paper describe safeguards that have been put in place for responsible release of data or models that have a high risk for misuse (e.g., pretrained language models, image generators, or scraped datasets)?

Answer: [NA]

Justification: This paper proposes a foundational optimization algorithm aimed at improving the training efficiency and effectiveness of deep neural networks.

Guidelines:

- The answer NA means that the paper poses no such risks.
- Released models that have a high risk for misuse or dual-use should be released with necessary safeguards to allow for controlled use of the model, for example by requiring that users adhere to usage guidelines or restrictions to access the model or implementing safety filters.
- Datasets that have been scraped from the Internet could pose safety risks. The authors should describe how they avoided releasing unsafe images.
- We recognize that providing effective safeguards is challenging, and many papers do not require this, but we encourage authors to take this into account and make a best faith effort.

## 12. Licenses for existing assets

Question: Are the creators or original owners of assets (e.g., code, data, models), used in the paper, properly credited and are the license and terms of use explicitly mentioned and properly respected?

Answer: [Yes]

Justification: All existing assets, such as datasets, baseline model architectures, and optimizers are properly credited via citations in the paper. Key open-source projects utilized include Karpathy's NanoGPT (Karpathy [2022], MIT License) and the specific version of Muon code we adapted from [github.com/KellerJordan/Muon](https://github.com/KellerJordan/Muon) (Jordan et al. [2024], MIT License). For finetuning GPT-2 (Radford et al. [2019]), we utilized example scripts from the Hugging Face Transformers library (which is Apache 2.0 licensed). The datasets are standard benchmarks with established public licenses, and we have respected their terms of use.

Guidelines:

- The answer NA means that the paper does not use existing assets.

- The authors should cite the original paper that produced the code package or dataset.
- The authors should state which version of the asset is used and, if possible, include a URL.
- The name of the license (e.g., CC-BY 4.0) should be included for each asset.
- For scraped data from a particular source (e.g., website), the copyright and terms of service of that source should be provided.
- If assets are released, the license, copyright information, and terms of use in the package should be provided. For popular datasets, [paperswithcode.com/datasets](https://paperswithcode.com/datasets) has curated licenses for some datasets. Their licensing guide can help determine the license of a dataset.
- For existing datasets that are re-packaged, both the original license and the license of the derived asset (if it has changed) should be provided.
- If this information is not available online, the authors are encouraged to reach out to the asset's creators.

### 13. New assets

Question: Are new assets introduced in the paper well documented and is the documentation provided alongside the assets?

Answer: [\[Yes\]](#)

Justification: An anonymized version of our code and experimental scripts is provided in the supplementary material. This includes initial documentation (e.g., a README with setup instructions and guidance for running key experiments), which will be further detailed for the full public release.

Guidelines:

- The answer NA means that the paper does not release new assets.
- Researchers should communicate the details of the dataset/code/model as part of their submissions via structured templates. This includes details about training, license, limitations, etc.
- The paper should discuss whether and how consent was obtained from people whose asset is used.
- At submission time, remember to anonymize your assets (if applicable). You can either create an anonymized URL or include an anonymized zip file.

### 14. Crowdsourcing and research with human subjects

Question: For crowdsourcing experiments and research with human subjects, does the paper include the full text of instructions given to participants and screenshots, if applicable, as well as details about compensation (if any)?

Answer: [\[NA\]](#)

Justification: The paper does not involve crowdsourcing nor research with human subjects.

Guidelines:

- The answer NA means that the paper does not involve crowdsourcing nor research with human subjects.
- Including this information in the supplemental material is fine, but if the main contribution of the paper involves human subjects, then as much detail as possible should be included in the main paper.
- According to the NeurIPS Code of Ethics, workers involved in data collection, curation, or other labor should be paid at least the minimum wage in the country of the data collector.

### 15. Institutional review board (IRB) approvals or equivalent for research with human subjects

Question: Does the paper describe potential risks incurred by study participants, whether such risks were disclosed to the subjects, and whether Institutional Review Board (IRB) approvals (or an equivalent approval/review based on the requirements of your country or institution) were obtained?

1241 Answer: [NA]  
 1242 Justification: The paper does not involve crowdsourcing nor research with human subjects.  
 1243 Guidelines:  
 1244 • The answer NA means that the paper does not involve crowdsourcing nor research with  
 1245 human subjects.  
 1246 • Depending on the country in which research is conducted, IRB approval (or equivalent)  
 1247 may be required for any human subjects research. If you obtained IRB approval, you  
 1248 should clearly state this in the paper.  
 1249 • We recognize that the procedures for this may vary significantly between institutions  
 1250 and locations, and we expect authors to adhere to the NeurIPS Code of Ethics and the  
 1251 guidelines for their institution.  
 1252 • For initial submissions, do not include any information that would break anonymity (if  
 1253 applicable), such as the institution conducting the review.  
 1254  
 1255 **16. Declaration of LLM usage**  
 1256 Question: Does the paper describe the usage of LLMs if it is an important, original, or  
 1257 non-standard component of the core methods in this research? Note that if the LLM is used  
 1258 only for writing, editing, or formatting purposes and does not impact the core methodology,  
 1259 scientific rigorousness, or originality of the research, declaration is not required.  
 1260 Answer: [NA]  
 1261 Justification: Core method development in this research does not involve LLMs as any  
 1262 important, original, or non-standard components. We only used an LLM for assistance  
 1263 with writing, editing, or formatting purposes, and this usage does not impact the core  
 1264 methodology, scientific rigor, or originality of the research.  
 1265 Guidelines:  
 1266 • The answer NA means that the core method development in this research does not  
 1267 involve LLMs as any important, original, or non-standard components.  
 1268 • Please refer to our LLM policy (<https://neurips.cc/Conferences/2025/LLM>)  
 for what should or should not be described.
